# Supplementary material for: Mononuclear organogermanium(iv) catalysts for a [3 + 2] cycloaddition reaction
Source: Royal Society of Chemistry journal article supplement (doi:10.1039/d4dt00239c), 2024-01-01
Supplement: d4dt00239c1.pdf [file d4dt00239c1.pdf]

## Supporting Information

### **Mononuclear organogermanium(IV) catalysts for a [3+2] cycloaddition reaction**

**Debayan Basu<sup>a</sup>, Barshali Ghosh<sup>a</sup>, Diship Srivastava<sup>a</sup>, Niladri Patra<sup>a</sup> and Hari Pada  
Nayek<sup>a\*</sup>**

*<sup>a</sup>Department of Chemistry and Chemical Biology, Indian Institute of Technology (Indian School  
of Mines), Dhanbad-826004, Jharkhand, India*

Email: [hpnayek@iitism.ac.in](mailto:hpnayek@iitism.ac.in)

## Table of contents

| Figure/Table | Content                                                                                                                                                                                                                                                                                  | Page |
|--------------|------------------------------------------------------------------------------------------------------------------------------------------------------------------------------------------------------------------------------------------------------------------------------------------|------|
| Figure S1    | FT-IR spectra of Schiff base pro-ligand <b>H<sub>2</sub>L<sup>1</sup></b> and compound <b>1</b>                                                                                                                                                                                          | 4    |
| Figure S2    | FT-IR spectra of Schiff base pro-ligand <b>H<sub>2</sub>L<sup>2</sup></b> and compound <b>2</b>                                                                                                                                                                                          | 4    |
| Figure S3    | FT-IR spectra of Schiff base pro-ligand <b>H<sub>2</sub>L<sup>3</sup></b> and compound <b>3</b>                                                                                                                                                                                          | 5    |
| Figure S4    | <sup>1</sup> H NMR (400 MHz, DMSO- <i>d</i> <sub>6</sub> ) spectrum of compound <b>1</b>                                                                                                                                                                                                 | 5    |
| Figure S5    | <sup>13</sup> C{ <sup>1</sup> H} NMR (100 MHz, DMSO- <i>d</i> <sub>6</sub> ) spectrum of compound <b>1</b>                                                                                                                                                                               | 6    |
| Figure S6    | <sup>1</sup> H NMR (400 MHz, DMSO- <i>d</i> <sub>6</sub> ) spectrum of compound <b>2</b>                                                                                                                                                                                                 | 6    |
| Figure S7    | <sup>13</sup> C{ <sup>1</sup> H} NMR (100 MHz, DMSO- <i>d</i> <sub>6</sub> ) spectrum of compound <b>2</b>                                                                                                                                                                               | 7    |
| Figure S8    | <sup>1</sup> H NMR (400 MHz, DMSO- <i>d</i> <sub>6</sub> ) spectrum of compound <b>3</b>                                                                                                                                                                                                 | 7    |
| Figure S9    | <sup>13</sup> C{ <sup>1</sup> H} NMR (100 MHz, DMSO- <i>d</i> <sub>6</sub> ) spectrum of compound <b>3</b>                                                                                                                                                                               | 8    |
| Figure S10   | HRMS (ESI) spectrum of compound <b>1</b>                                                                                                                                                                                                                                                 | 8    |
| Figure S11   | HRMS (ESI) spectrum of [M+H] <sup>+</sup> ion of compound <b>1</b>                                                                                                                                                                                                                       | 9    |
| Figure S12   | HRMS (ESI) spectrum of compound <b>2</b>                                                                                                                                                                                                                                                 | 9    |
| Figure S13   | HRMS (ESI) spectrum of [M+H] <sup>+</sup> ion of compound <b>2</b>                                                                                                                                                                                                                       | 10   |
| Figure S14   | HRMS (ESI) spectrum of compound <b>3</b>                                                                                                                                                                                                                                                 | 10   |
| Figure S15   | HRMS (ESI) spectrum of [M+H] <sup>+</sup> ion of compound <b>3</b>                                                                                                                                                                                                                       | 11   |
| Table S1     | Single crystal data collection and data refinement parameters for compound <b>1</b> and <b>2</b>                                                                                                                                                                                         | 12   |
| Figure S16   | Packing of <b>1</b> within the unit cell viewed along crystallographic <i>a</i> axis                                                                                                                                                                                                     | 13   |
| Figure S17   | Packing of <b>2</b> within the unit cell viewed along crystallographic <i>b</i> axis                                                                                                                                                                                                     | 13   |
| Figure S18   | Plot of % yield (isolated) of product vs. catalyst loading for the synthesis of 5-substituted 1 <i>H</i> -tetrazole between sodium azide and benzonitrile. Reaction conditions: benzonitrile (0.40 mmol), sodium azide (0.80 mmol), compound <b>1</b> (2-10 mol %). Time: 8 h at 100 °C. | 14   |
| Figure S19   | Plot of % yield (isolated) of product vs. time for the synthesis of 5-substituted 1 <i>H</i> -tetrazole between sodium azide and benzonitrile. Reaction conditions: benzonitrile (0.40 mmol), sodium azide (0.80 mmol), compound <b>1</b> (6 mol %) at 100 °C.                           | 14   |
| Table S2     | Isolated yields of 5-substituted 1 <i>H</i> -tetrazoles of various nitriles with sodium azide                                                                                                                                                                                            | 15   |
| Table S3     | Characterization of isolated 5-substituted 1 <i>H</i> -tetrazoles of various nitriles with sodium azide                                                                                                                                                                                  | 16   |
| Figure S20   | <sup>1</sup> H NMR (400 MHz, DMSO- <i>d</i> <sub>6</sub> ) spectrum of <b>4a</b>                                                                                                                                                                                                         | 17   |
| Figure S21   | <sup>13</sup> C{ <sup>1</sup> H} NMR (100 MHz, DMSO- <i>d</i> <sub>6</sub> ) spectrum of <b>4a</b>                                                                                                                                                                                       | 18   |
| Figure S22   | <sup>1</sup> H NMR (400 MHz, DMSO- <i>d</i> <sub>6</sub> ) spectrum of <b>4b</b>                                                                                                                                                                                                         | 18   |
| Figure S23   | <sup>13</sup> C{ <sup>1</sup> H} NMR (100 MHz, DMSO- <i>d</i> <sub>6</sub> ) spectrum of <b>4b</b>                                                                                                                                                                                       | 19   |
| Figure S24   | <sup>1</sup> H NMR (400 MHz, CDCl <sub>3</sub> ) spectrum of <b>4c</b>                                                                                                                                                                                                                   | 19   |
| Figure S25   | <sup>13</sup> C{ <sup>1</sup> H} NMR (100 MHz, CDCl <sub>3</sub> ) spectrum of <b>4c</b>                                                                                                                                                                                                 | 20   |
| Figure S26   | <sup>1</sup> H NMR (400 MHz, DMSO- <i>d</i> <sub>6</sub> ) spectrum of <b>4d</b>                                                                                                                                                                                                         | 20   |
| Figure S27   | <sup>13</sup> C{ <sup>1</sup> H} NMR (100 MHz, DMSO- <i>d</i> <sub>6</sub> ) spectrum of <b>4d</b>                                                                                                                                                                                       | 21   |
| Figure S28   | <sup>1</sup> H NMR (400 MHz, DMSO- <i>d</i> <sub>6</sub> ) spectrum of <b>4e</b>                                                                                                                                                                                                         | 21   |
| Figure S29   | <sup>13</sup> C{ <sup>1</sup> H} NMR (100 MHz, DMSO- <i>d</i> <sub>6</sub> ) spectrum of <b>4e</b>                                                                                                                                                                                       | 22   |
| Figure S30   | <sup>1</sup> H NMR (400 MHz, CDCl <sub>3</sub> ) spectrum of <b>4f</b>                                                                                                                                                                                                                   | 22   |
| Figure S31   | <sup>13</sup> C{ <sup>1</sup> H} NMR (100 MHz, CDCl <sub>3</sub> ) spectrum of <b>4f</b>                                                                                                                                                                                                 | 23   |
| Figure S32   | <sup>1</sup> H NMR (400 MHz, DMSO- <i>d</i> <sub>6</sub> ) spectrum of <b>4g</b>                                                                                                                                                                                                         | 23   |
| Figure S33   | <sup>13</sup> C{ <sup>1</sup> H} NMR (100 MHz, DMSO- <i>d</i> <sub>6</sub> ) spectrum of <b>4g</b>                                                                                                                                                                                       | 24   |
| Figure S34   | <sup>1</sup> H NMR (400 MHz, DMSO- <i>d</i> <sub>6</sub> ) spectrum of <b>4h</b>                                                                                                                                                                                                         | 24   |

|            |                                                                                                                                          |    |
|------------|------------------------------------------------------------------------------------------------------------------------------------------|----|
| Figure S35 | $^{13}\text{C}\{^1\text{H}\}$ NMR (100 MHz, DMSO- $d_6$ ) spectrum of <b>4h</b>                                                          | 25 |
| Figure S36 | $^1\text{H}$ NMR (400 MHz, DMSO- $d_6$ ) spectrum of <b>4i</b>                                                                           | 25 |
| Figure S37 | $^{13}\text{C}\{^1\text{H}\}$ NMR (100 MHz, DMSO- $d_6$ ) spectrum of <b>4i</b>                                                          | 26 |
| Figure S38 | $^1\text{H}$ NMR (400 MHz, DMSO- $d_6$ ) spectrum of <b>4j</b>                                                                           | 26 |
| Figure S39 | $^{13}\text{C}\{^1\text{H}\}$ NMR (100 MHz, DMSO- $d_6$ ) spectrum of <b>4j</b>                                                          | 27 |
| Figure S40 | $^1\text{H}$ NMR (400 MHz, DMSO- $d_6$ ) spectrum of <b>4k</b>                                                                           | 27 |
| Figure S41 | $^{13}\text{C}\{^1\text{H}\}$ NMR (100 MHz, DMSO- $d_6$ ) spectrum of <b>4k</b>                                                          | 28 |
| Figure S42 | $^1\text{H}$ NMR (400 MHz, DMSO- $d_6$ ) spectrum of <b>4l</b>                                                                           | 28 |
| Figure S43 | $^{13}\text{C}\{^1\text{H}\}$ NMR (100 MHz, DMSO- $d_6$ ) spectrum of <b>4l</b>                                                          | 29 |
| Figure S44 | 1,5-disubstituted intermediate ( <b>B</b> ) and 2,5-disubstituted Intermediate ( <b>B'</b> ) with numbering scheme in Path I and Path II | 30 |
| Table S4   | Bond lengths present in various stationary states. All values are reported in Å                                                          | 30 |
| Figure S45 | DFT-optimized geometry of azide ion                                                                                                      | 31 |
| Table S5   | Cartesian coordinates of DFT-optimized geometry of azide ion                                                                             | 31 |
| Figure S46 | DFT-optimized geometry of benzonitrile                                                                                                   | 32 |
| Table S6   | Cartesian coordinates of DFT-optimized geometry of benzonitrile.                                                                         | 32 |
| Figure S47 | DFT-optimized geometry of compound <b>1</b> [Ge(IV) compound]                                                                            | 33 |
| Table S7   | Cartesian coordinates of DFT-optimized geometry of compound <b>1</b> [Ge(IV) compound]                                                   | 33 |
| Figure S48 | DFT-optimized geometry of compound <b>1</b> and azide (Transition state 1)                                                               | 35 |
| Table S8   | Cartesian coordinates of DFT-optimized geometry of compound <b>1</b> and azide (Transition state 1)                                      | 35 |
| Figure S49 | DFT-optimized geometry of compound <b>1</b> and azide (Intermediate A)                                                                   | 37 |
| Table S9   | Cartesian coordinates of DFT-optimized geometry of compound <b>1</b> and azide (Intermediate A)                                          | 37 |
| Figure S50 | DFT-optimized geometry of Intermediate A and benzonitrile (Transition state 2)                                                           | 39 |
| Table S10  | Cartesian coordinates of DFT-optimized geometry of Intermediate A and benzonitrile (Transition state 2)                                  | 40 |
| Figure S51 | DFT-optimized geometry of Intermediate A and benzonitrile (Transition state 2')                                                          | 42 |
| Table S11  | Cartesian coordinates of DFT-optimized geometry of Intermediate A and benzonitrile (Transition state 2')                                 | 42 |
| Figure S52 | DFT-optimized geometry of Intermediate A and benzonitrile (Intermediate B)                                                               | 45 |
| Table S12  | Cartesian coordinates of DFT-optimized geometry of Intermediate A and benzonitrile (Intermediate B)                                      | 45 |
| Figure S53 | DFT-optimized geometry of Intermediate A and benzonitrile (Intermediate B')                                                              | 48 |
| Table S13  | Cartesian coordinates of DFT-optimized geometry of Intermediate A and benzonitrile (Intermediate B')                                     | 48 |
| Figure S54 | DFT-optimized geometry of 5-substituted 1 <i>H</i> -tetrazole                                                                            | 51 |
| Table S14  | Cartesian coordinates of DFT-optimized geometry of 5-substituted 1 <i>H</i> -tetrazole                                                   | 51 |
| Table S15  | Different catalysts used for the synthesis of 5-substituted 1 <i>H</i> -tetrazoles.                                                      | 52 |

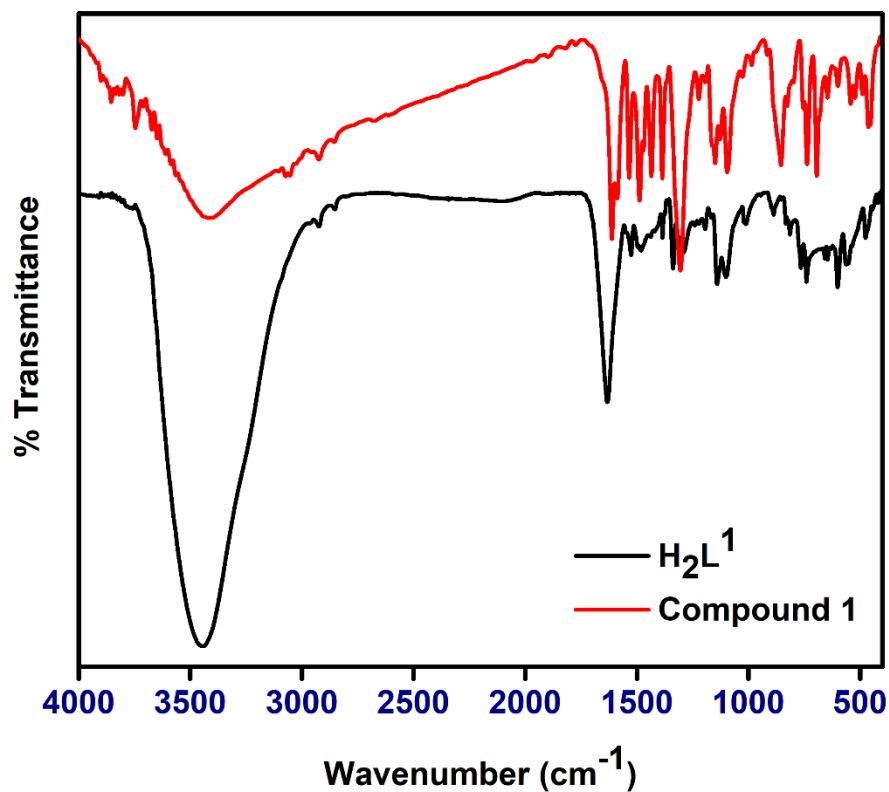

Figure S1. FT-IR spectra of Schiff base pro-ligand  $H_2L^1$  and compound 1.

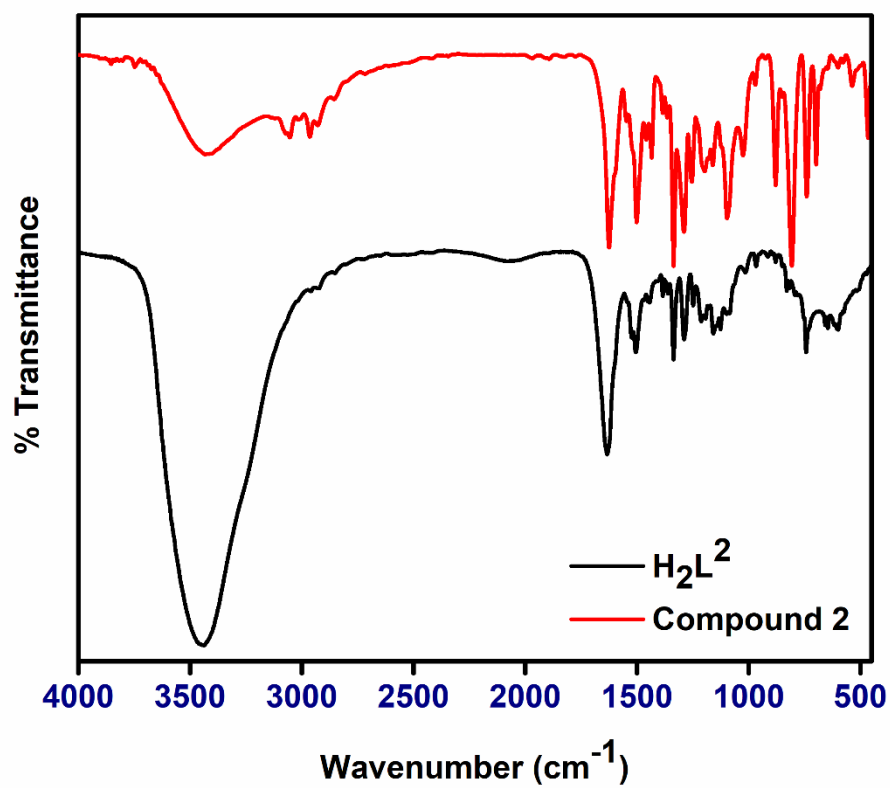

Figure S2. FT-IR spectra of Schiff base pro-ligand  $H_2L^2$  and compound 2.

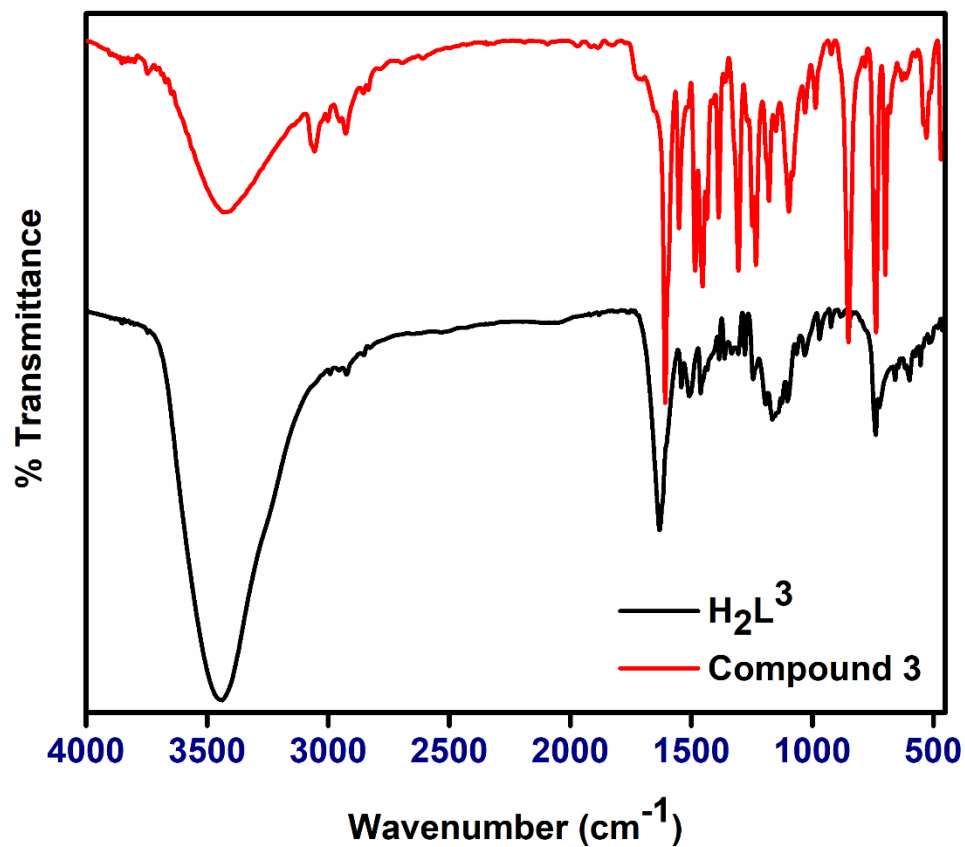

Figure S3. FT-IR spectra of Schiff base pro-ligand  $H_2L^3$  and compound 3.

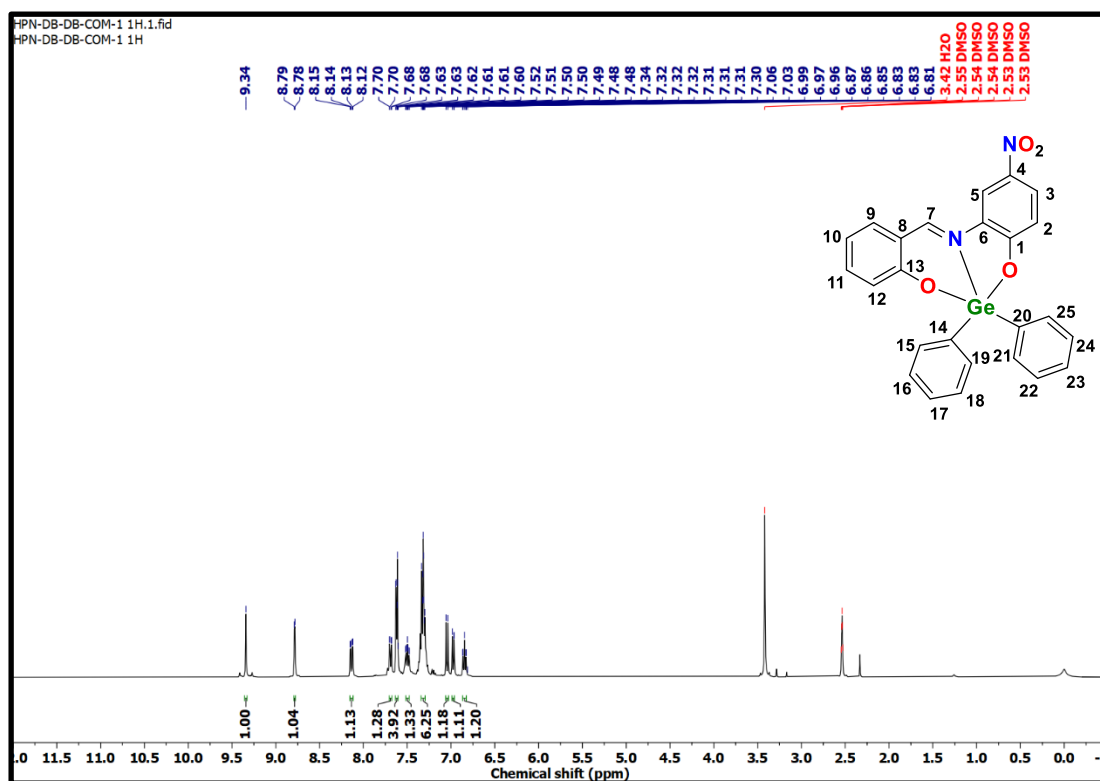

Figure S4.  $^1H$  NMR (400 MHz,  $DMSO-d_6$ ) spectrum of compound 1.

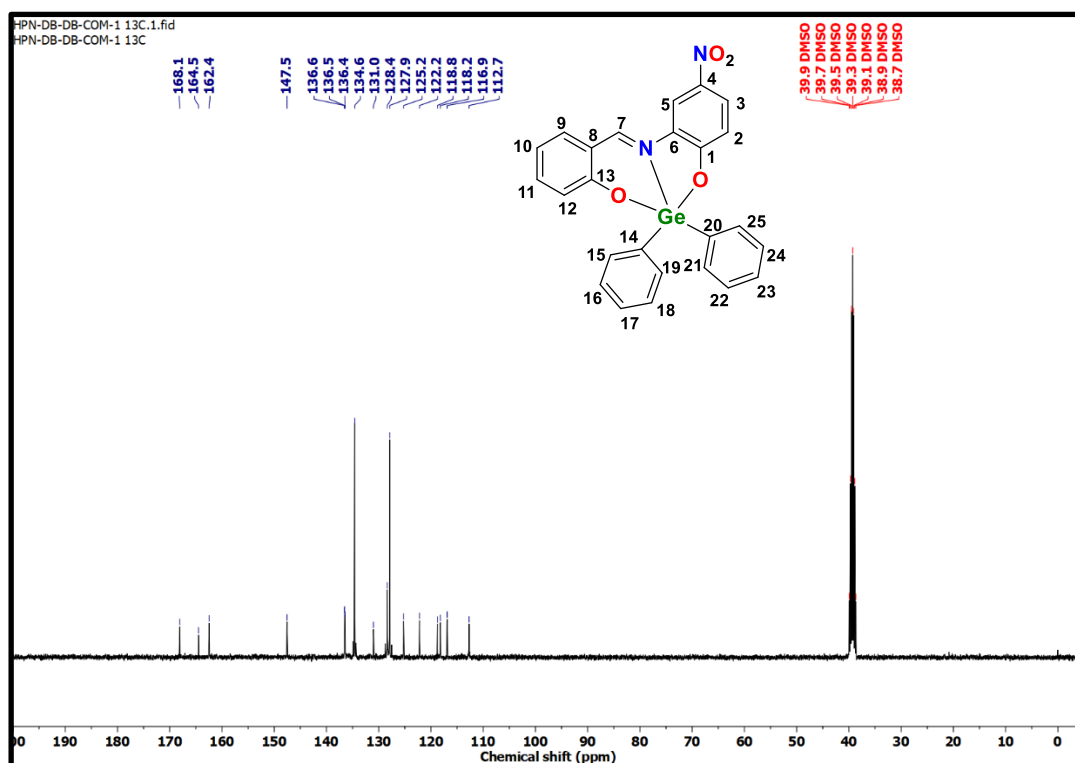

Figure S5.  $^{13}\text{C}\{^1\text{H}\}$  NMR (100 MHz,  $\text{DMSO-}d_6$ ) spectrum of compound 1.

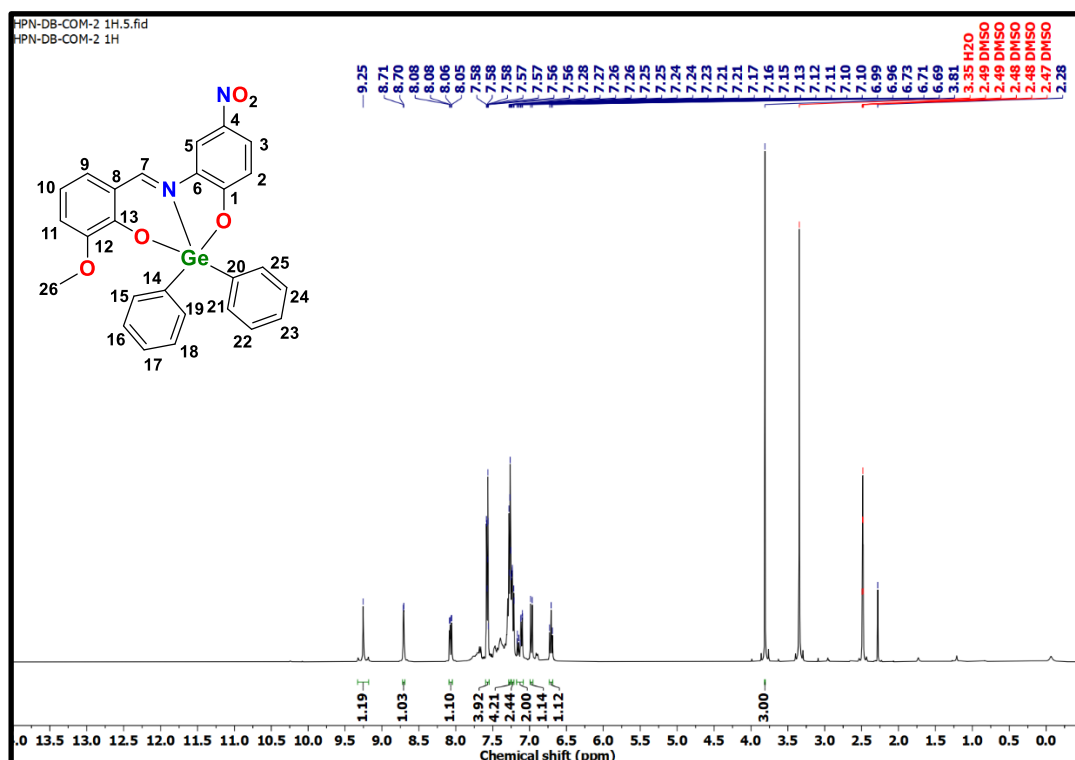

Figure S6.  $^1\text{H}$  NMR (400 MHz,  $\text{DMSO-}d_6$ ) spectrum of compound 2.

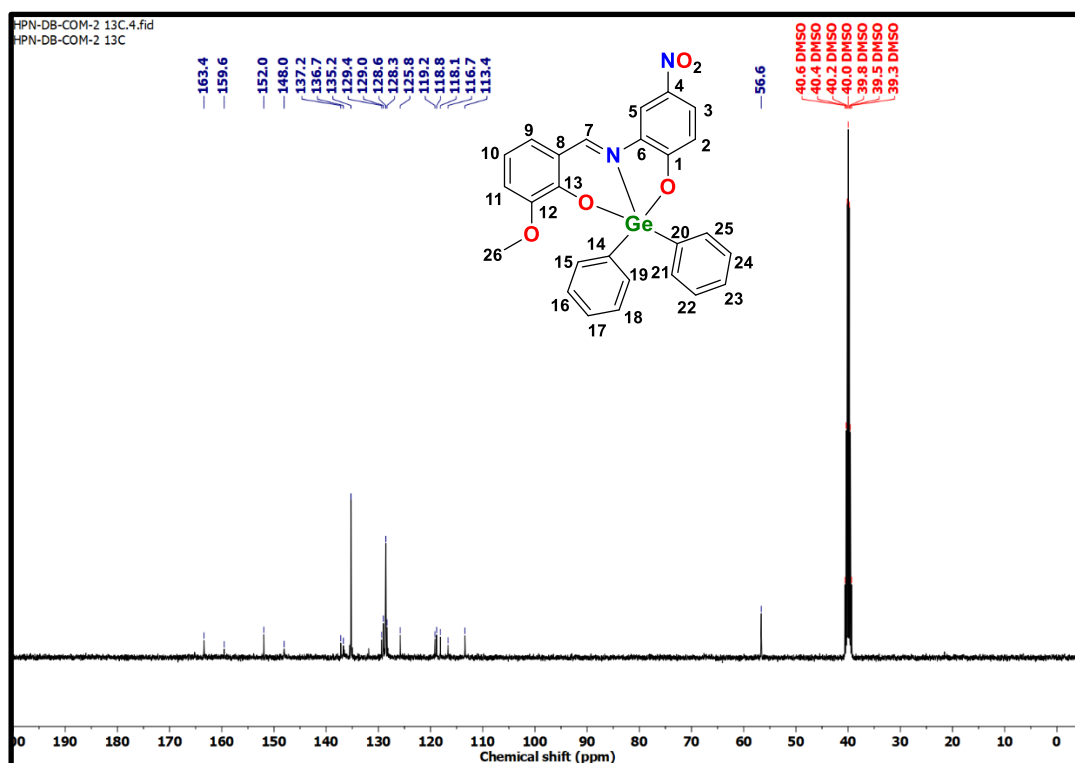

Figure S7.  $^{13}\text{C}\{^1\text{H}\}$  NMR (100 MHz,  $\text{DMSO-}d_6$ ) spectrum of compound 2.

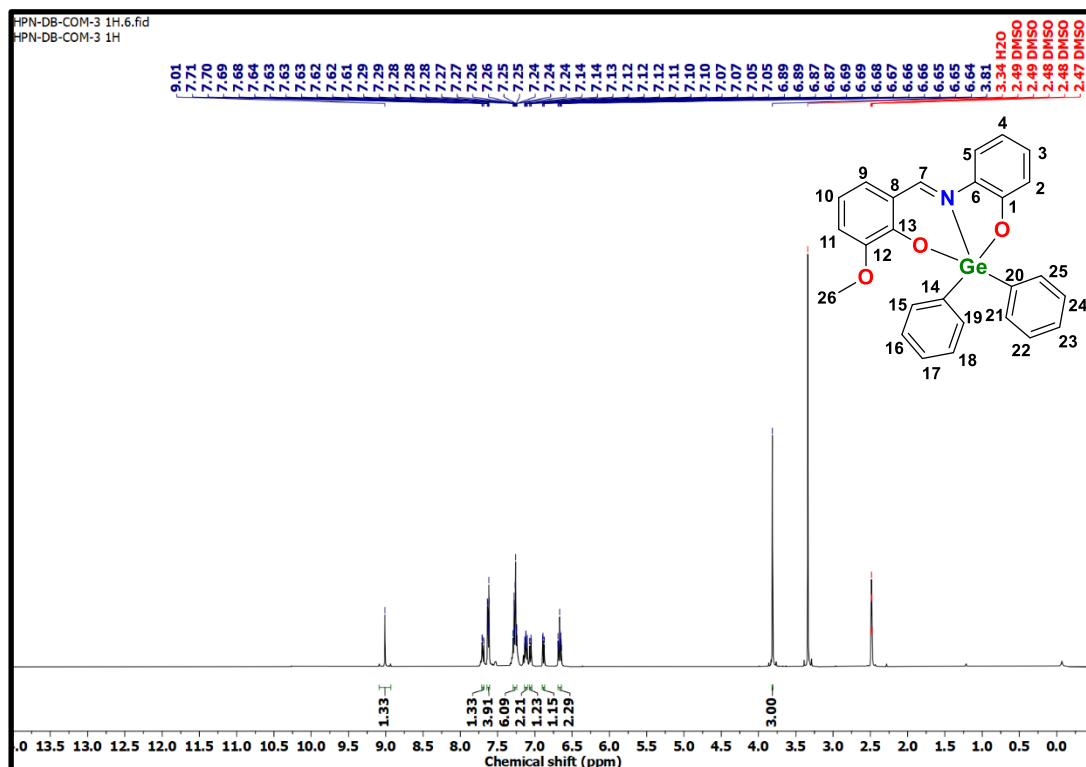

Figure S8.  $^1\text{H}$  NMR (400 MHz,  $\text{DMSO-}d_6$ ) spectrum of compound 3.

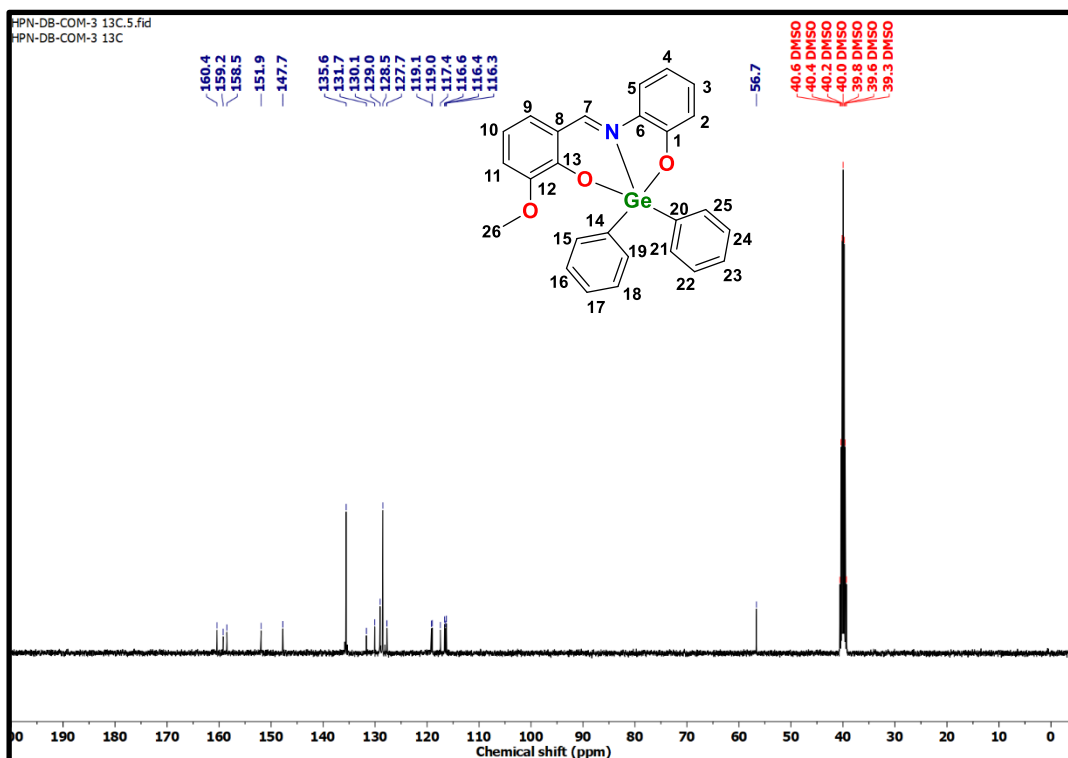

Figure S9.  $^{13}\text{C}\{^1\text{H}\}$  NMR (100 MHz,  $\text{DMSO-}d_6$ ) spectrum of compound 3.

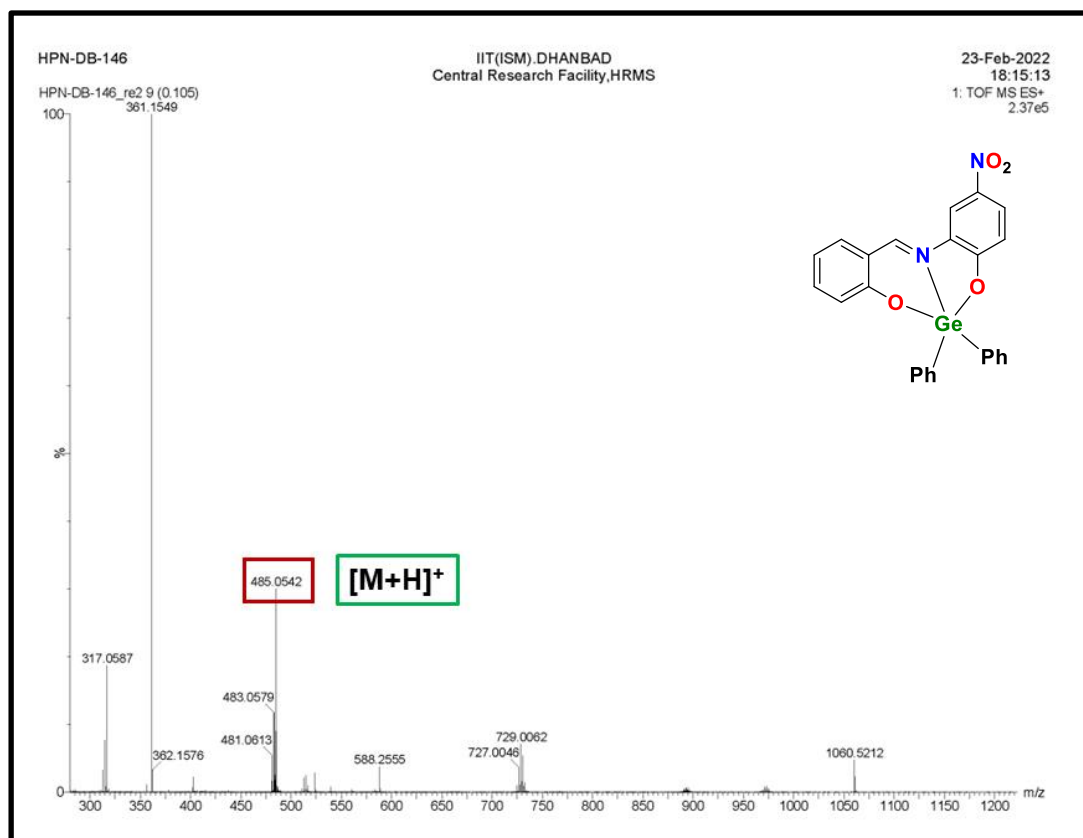

Figure S10. HRMS (ESI) spectrum of compound 1.



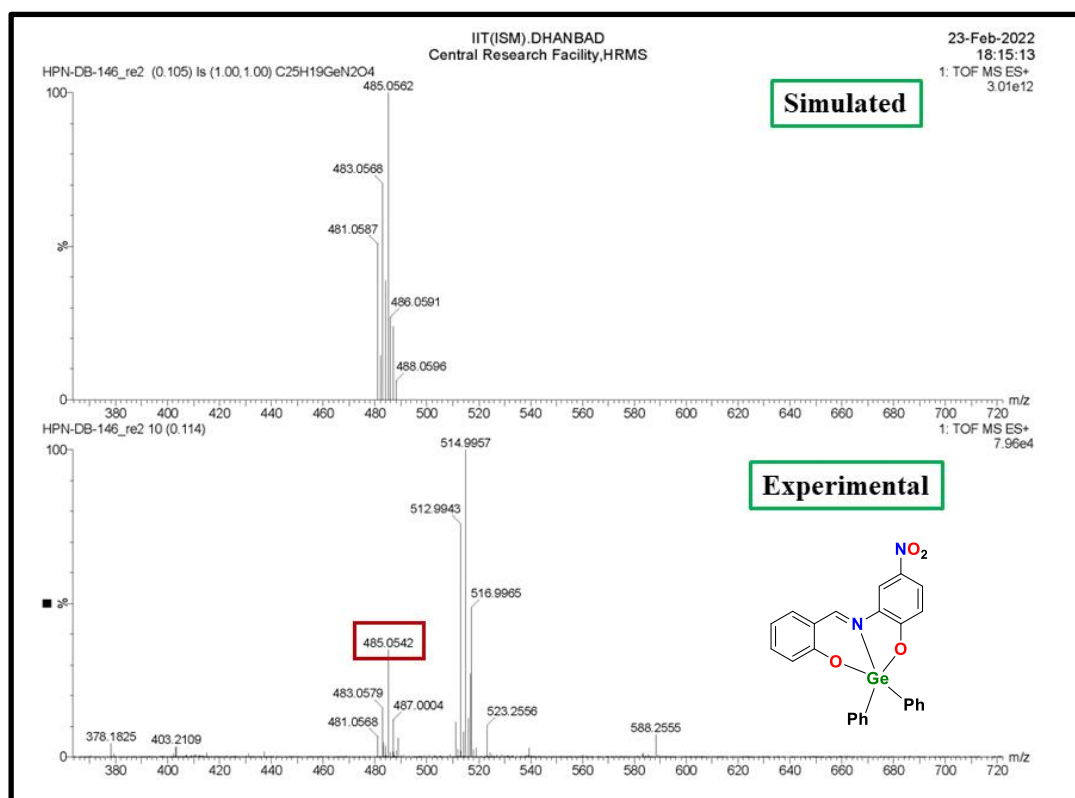

Figure S11. HRMS (ESI) spectrum of  $[M+H]^+$  ion of compound 1.

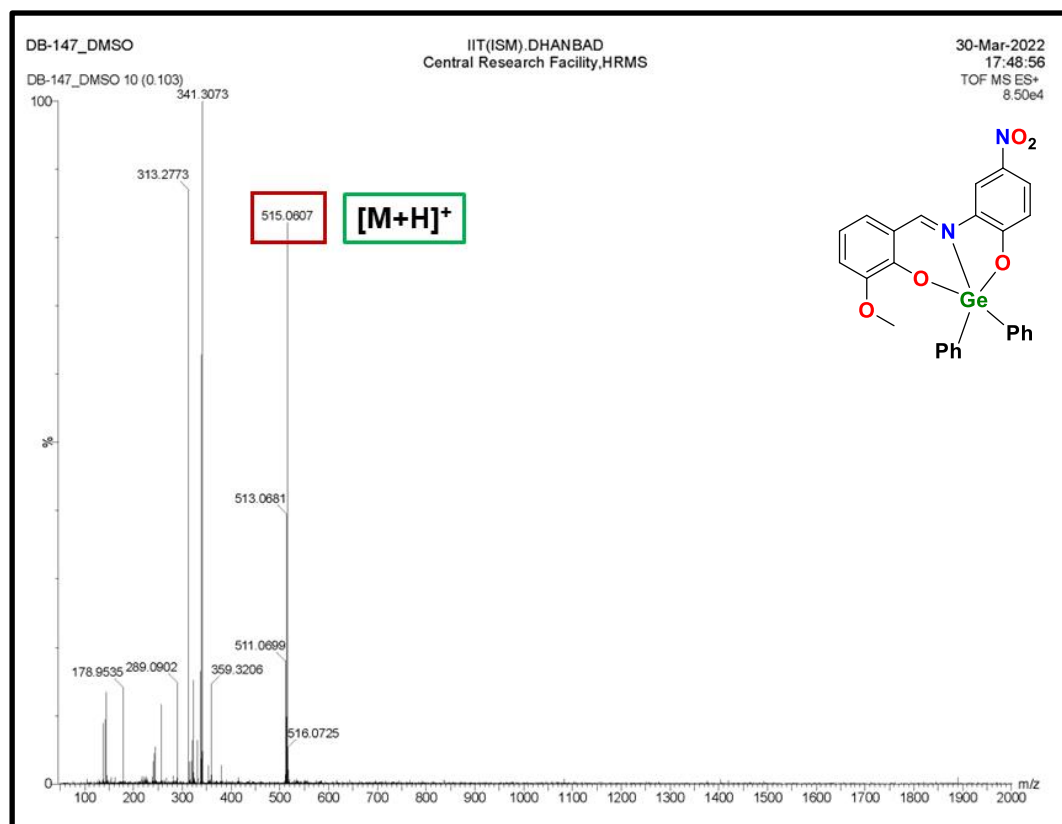

Figure S12. HRMS (ESI) spectrum of compound 2.

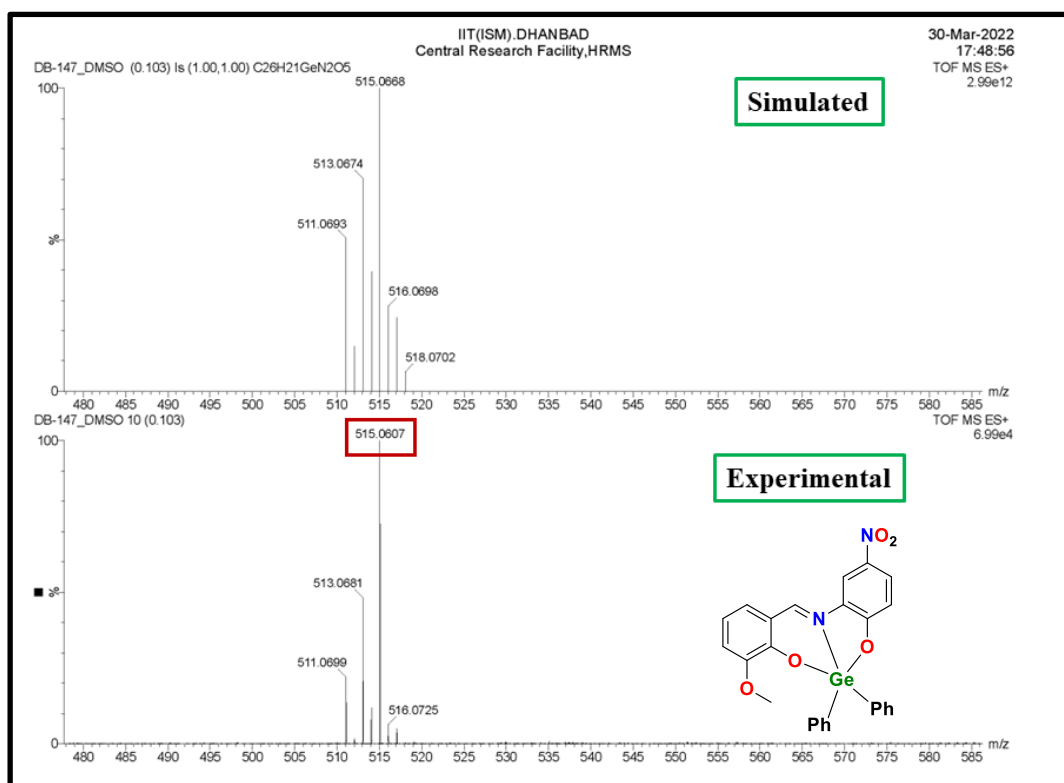

Figure S13. HRMS (ESI) spectrum of  $[M+H]^+$  ion of compound 2.

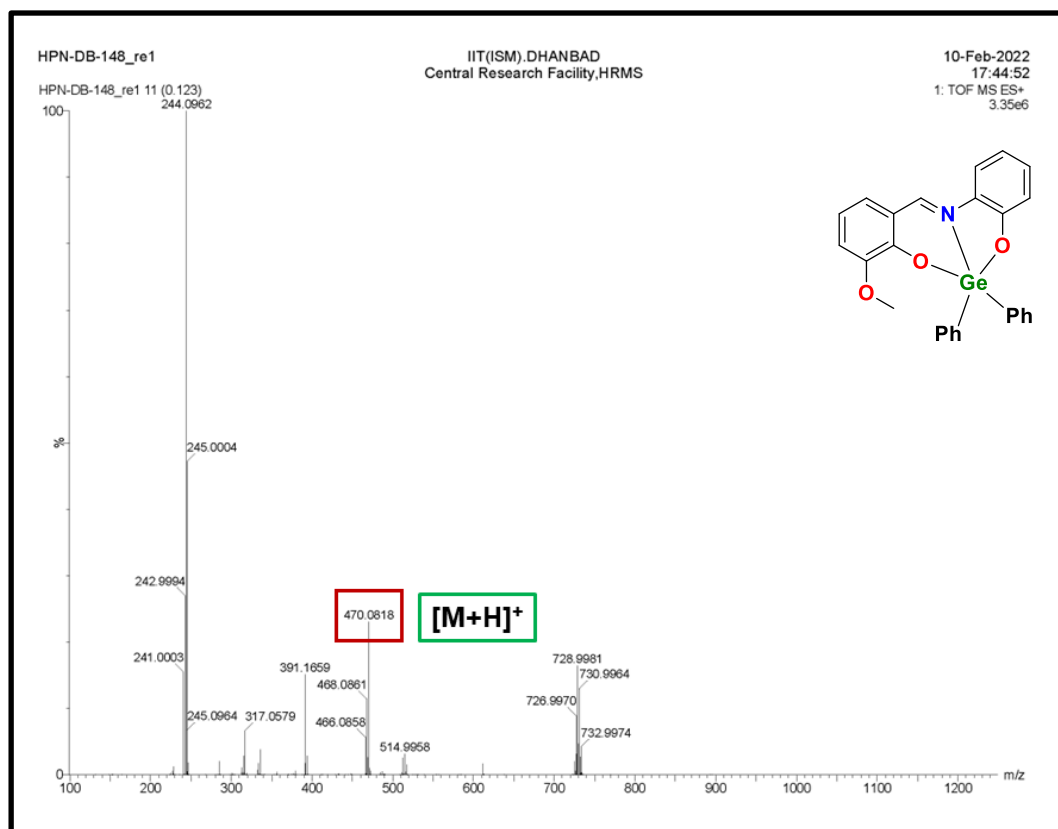

Figure S14. HRMS (ESI) spectrum of compound 3.

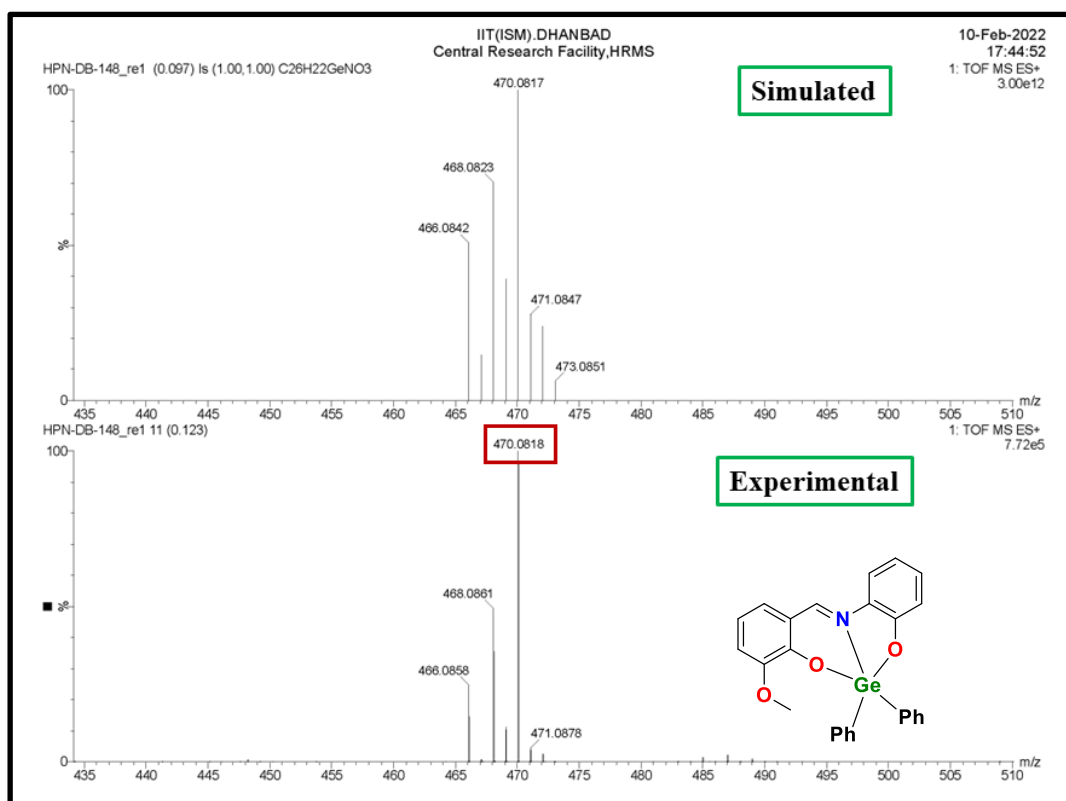

**Figure S15.** HRMS (ESI) spectrum of  $[M+H]^+$  ion of compound **3**.

### X-ray crystallography:

The crystallographic data of **1-2** were collected on a Rigaku SuperNova diffractometer equipped with an Eos S2 CCD detector, using Mo-K $\alpha$  radiation with graphite monochromator ( $\lambda = 0.71073 \text{ \AA}$ ) at  $T = 293(2) \text{ K}$ . The structure was solved with the ShelXT 2014/5 (Sheldrick, 2014) solution program and by using Olex2 as the graphical interface. The model was refined with version 2018/3 of XL using Least Squares minimization. Non-hydrogen atoms were anisotropically refined. H-atoms were included in the refinement of calculated positions riding on their carrier atoms. The function minimized was  $[\sum w(F_o^2 - F_c^2)^2]$  ( $w = 1 / [\sigma^2(F_o^2) + (aP)^2 + bP]$ ), where  $P = (\text{Max}(F_o^2, 0) + 2F_c^2) / 3$  with  $\sigma^2(F_o^2)$  from counting statistics. The function  $R1$  and  $wR2$  were  $(\sum ||F_o| - |F_c||) / \sum |F_o|$  and  $[\sum w(F_o^2 - F_c^2)^2 / \sum wF_o^4]^{1/2}$ , respectively. CCDC 2328314-2328315 contain the supplementary crystallographic data for compounds **1-2**. These data can be obtained free of charge from The Cambridge Crystallographic Data Centre via [www.ccdc.cam.ac.uk/data\\_request/cif](http://www.ccdc.cam.ac.uk/data_request/cif)

**Table S1.** Single crystal data collection and data refinement parameters for compound **1** and **2**.

| Compound                                              | <b>1</b>                                                            | <b>2</b>                                                            |
|-------------------------------------------------------|---------------------------------------------------------------------|---------------------------------------------------------------------|
| Empirical formula                                     | C <sub>25</sub> H <sub>18</sub> GeN <sub>2</sub> O <sub>4</sub>     | C <sub>26</sub> H <sub>20</sub> GeN <sub>2</sub> O <sub>5</sub>     |
| Formula weight                                        | 483.00                                                              | 513.03                                                              |
| Temperature/K                                         | 293(2)                                                              | 293(2)                                                              |
| Crystal system                                        | triclinic                                                           | triclinic                                                           |
| Space group                                           | <i>P</i> -1                                                         | <i>P</i> -1                                                         |
| <i>a</i> /Å                                           | 7.9042(8)                                                           | 11.1870(5)                                                          |
| <i>b</i> /Å                                           | 9.6253(9)                                                           | 12.4501(6)                                                          |
| <i>c</i> /Å                                           | 14.8290(13)                                                         | 16.3530(8)                                                          |
| $\alpha$ /°                                           | 78.913(7)                                                           | 81.627(4)                                                           |
| $\beta$ /°                                            | 89.952(8)                                                           | 89.040(4)                                                           |
| $\gamma$ /°                                           | 73.801(8)                                                           | 82.921(4)                                                           |
| Volume/Å <sup>3</sup>                                 | 1061.51(2)                                                          | 2236.18(19)                                                         |
| <i>Z</i>                                              | 2                                                                   | 4                                                                   |
| $\rho_{\text{calc}}/\text{cm}^3$                      | 1.511                                                               | 1.524                                                               |
| $\mu/\text{mm}^{-1}$                                  | 1.479                                                               | 1.412                                                               |
| <i>F</i> (000)                                        | 492.0                                                               | 1048.0                                                              |
| Crystal size/mm <sup>3</sup>                          | 0.13 × 0.12 × 0.10                                                  | 0.12 × 0.10 × 0.08                                                  |
| Radiation                                             | MoK $\alpha$ ( $\lambda$ = 0.71073)                                 | MoK $\alpha$ ( $\lambda$ = 0.71073)                                 |
| 2 $\theta$ range for data collection/°                | 4.498 to 53.998                                                     | 3.874 to 52.744                                                     |
| Index ranges                                          | -10 ≤ <i>h</i> ≤ 10,<br>-12 ≤ <i>k</i> ≤ 12,<br>-18 ≤ <i>l</i> ≤ 18 | -13 ≤ <i>h</i> ≤ 13,<br>-15 ≤ <i>k</i> ≤ 15,<br>-20 ≤ <i>l</i> ≤ 20 |
| Reflections collected                                 | 16290                                                               | 19042                                                               |
| Independent reflections                               | 4609 [R <sub>int</sub> = 0.0774,<br>R <sub>sigma</sub> = 0.0690]    | 9148 [R <sub>int</sub> = 0.0404,<br>R <sub>sigma</sub> = 0.0694]    |
| Data/reIntermediateaints/parameters                   | 4609/0/289                                                          | 9148/0/615                                                          |
| Goodness-of-fit on F <sup>2</sup>                     | 1.053                                                               | 0.936                                                               |
| Final R indexes [ <i>I</i> ≥ 2 $\sigma$ ( <i>I</i> )] | R <sub>1</sub> = 0.0535,<br>wR <sub>2</sub> = 0.1420                | R <sub>1</sub> = 0.0418, wR <sub>2</sub> =<br>0.0741                |
| Final R indexes [all data]                            | R <sub>1</sub> = 0.0752,<br>wR <sub>2</sub> = 0.1522                | R <sub>1</sub> = 0.0830, wR <sub>2</sub> =<br>0.0825                |
| Largest diff. peak/hole / e Å <sup>-3</sup>           | 1.05/-0.68                                                          | 0.35/-0.33                                                          |

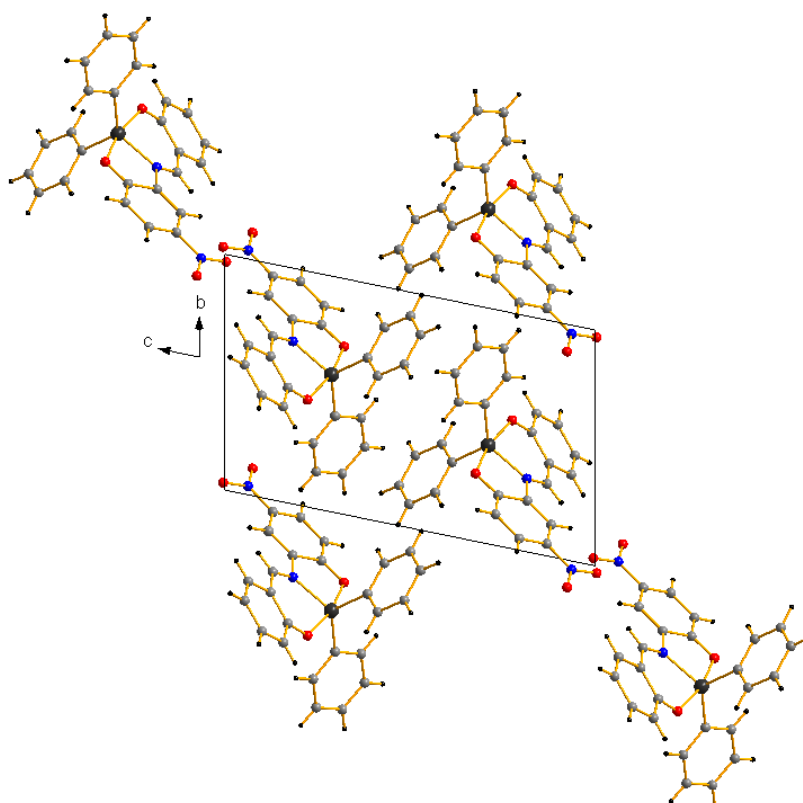

**Figure S16.** Packing of **1** within the unit cell viewed along crystallographic *a* axis.

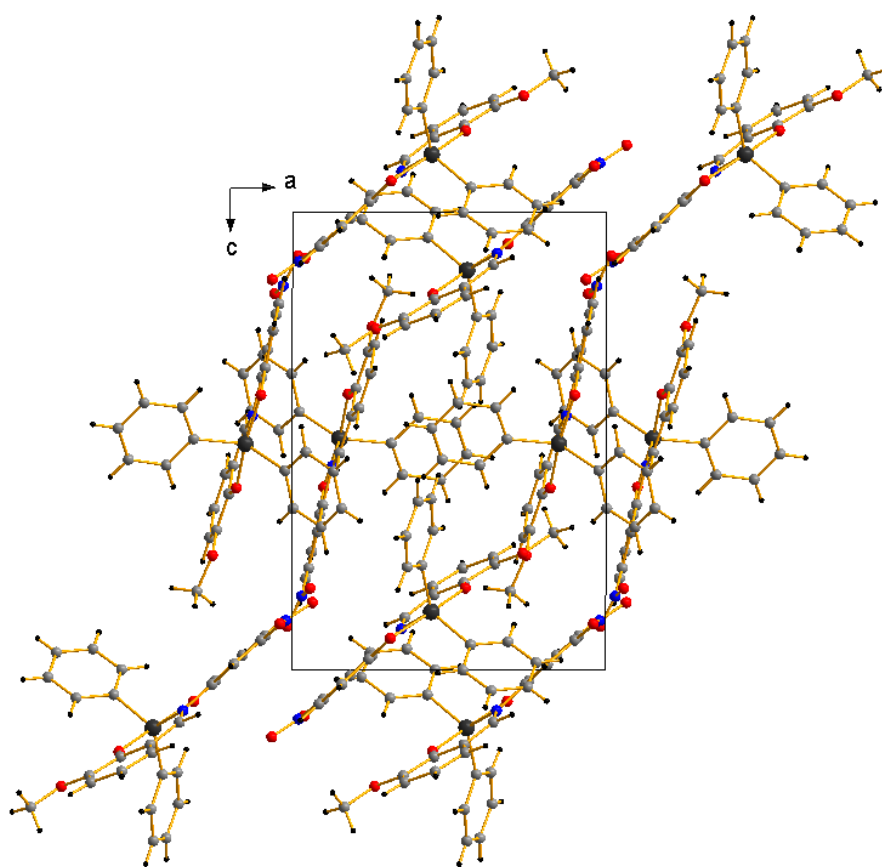

**Figure S17.** Packing of **2** within the unit cell viewed along crystallographic *b* axis.

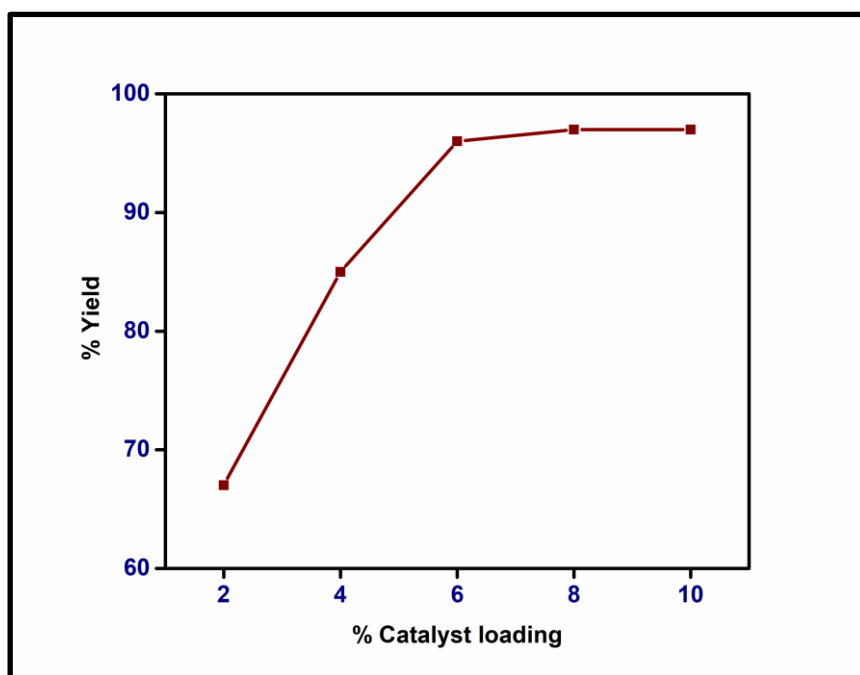

**Figure S18.** Plot of % yield (isolated) of product vs. catalyst loading for the synthesis of 5-substituted 1*H*-tetrazole between sodium azide and benzonitrile. Reaction condition: benzonitrile (0.40 mmol), sodium azide (0.80 mmol), compound **1** (2-10 mol %). Time: 8 h at 100 °C.

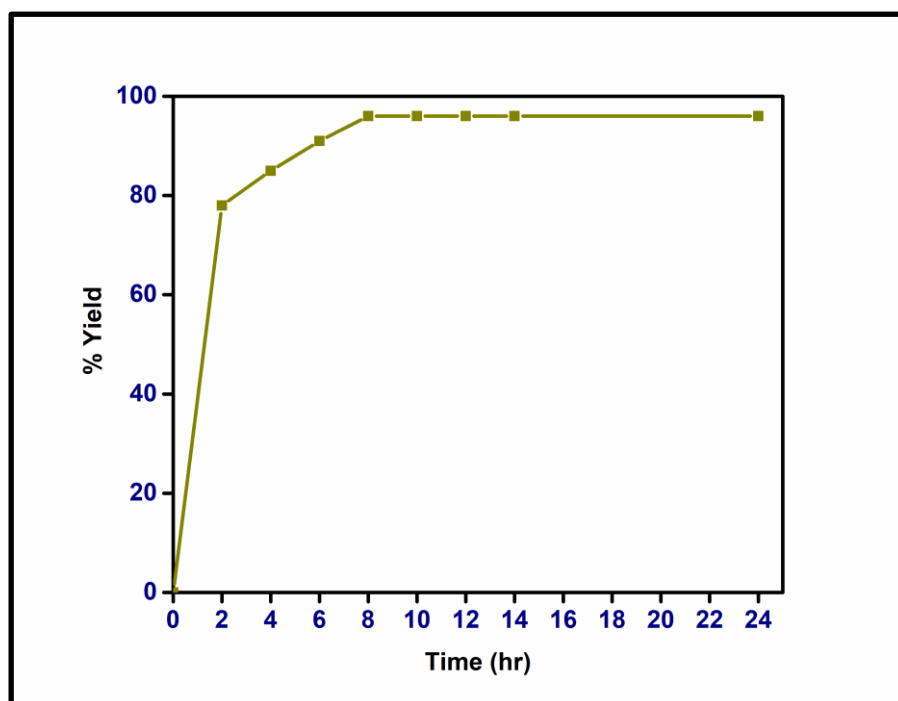

**Figure S19.** Plot of % yield (isolated) of product vs. time for the synthesis of 5-substituted 1*H*-tetrazole between sodium azide and benzonitrile. Reaction condition: benzonitrile (0.40 mmol), sodium azide (0.80 mmol), compound **1** (6 mol %) at 100 °C.

**Table S2.** Isolated yields of 5-substituted 1*H*-tetrazoles of various nitriles with sodium azide.

| $\text{RCN} + \text{NaN}_3 \xrightarrow[\text{Solvent-free, 100 } ^\circ\text{C, 8h}]{\text{Catalyst (6 mol\%)}} \text{R}-\text{C}(\text{N}=\text{N}-\text{N}=\text{N})-\text{NH}$ |          |         |      |           |      |                        |
|------------------------------------------------------------------------------------------------------------------------------------------------------------------------------------|----------|---------|------|-----------|------|------------------------|
| Entry                                                                                                                                                                              | Nitriles | Product | Code | Yield (%) | TON  | TOF (h <sup>-1</sup> ) |
| 1                                                                                                                                                                                  |          |         | 4a   | 96        | 16   | 2                      |
| 2                                                                                                                                                                                  |          |         | 4b   | 94        | 15.7 | 1.9                    |
| 3                                                                                                                                                                                  |          |         | 4c   | 76        | 12.7 | 1.6                    |
| 4                                                                                                                                                                                  |          |         | 4d   | 91        | 15.2 | 1.9                    |
| 5                                                                                                                                                                                  |          |         | 4e   | 92        | 15.3 | 1.9                    |
| 6                                                                                                                                                                                  |          |         | 4f   | 84        | 14   | 1.8                    |
| 7                                                                                                                                                                                  |          |         | 4g   | 88        | 14.7 | 1.8                    |
| 8                                                                                                                                                                                  |          |         | 4h   | 89        | 14.8 | 1.9                    |
| 9                                                                                                                                                                                  |          |         | 4i   | 94        | 15.7 | 2                      |
| 10                                                                                                                                                                                 |          |         | 4j   | 90        | 15   | 1.9                    |
| 11                                                                                                                                                                                 |          |         | 4k   | 83        | 13.8 | 1.7                    |
| 12                                                                                                                                                                                 |          |         | 4l   | 93        | 15.5 | 1.9                    |

**Table S3.** Characterization of isolated 5-substituted 1*H*-tetrazoles of various nitriles with sodium azide.

|                                                                                                                                           |                                                                                                                                                                                                                                                                                                        |
|-------------------------------------------------------------------------------------------------------------------------------------------|--------------------------------------------------------------------------------------------------------------------------------------------------------------------------------------------------------------------------------------------------------------------------------------------------------|
| 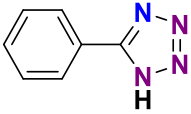 <p><b>5-phenyl-1<i>H</i>-tetrazole</b></p>              | <p><b>4a<sup>1</sup>:</b> Off-white solid. <sup>1</sup>H NMR (400 MHz, DMSO-<i>d</i><sub>6</sub>) δ 8.04 – 8.00 (m, 2H), 7.62 – 7.57 (m, 3H). <sup>13</sup>C{<sup>1</sup>H} NMR (100 MHz, DMSO-<i>d</i><sub>6</sub>) δ 155.8, 131.8, 129.9, 127.4, 124.6.</p>                                          |
|  <p><b>5-(4-bromophenyl)-1<i>H</i>-tetrazole</b></p>     | <p><b>4b<sup>2</sup>:</b> Off-white solid. <sup>1</sup>H NMR (400 MHz, DMSO-<i>d</i><sub>6</sub>) δ 7.98 – 7.94 (m, 2H), 7.83 – 7.79 (m, 2H). <sup>13</sup>C{<sup>1</sup>H} NMR (100 MHz, DMSO-<i>d</i><sub>6</sub>) δ 155.5, 133.0, 129.4, 125.2, 124.0.</p>                                          |
|  <p><b>4-(1<i>H</i>-tetrazol-5-yl)aniline</b></p>        | <p><b>4c<sup>1</sup>:</b> Light yellow solid. <sup>1</sup>H NMR (400 MHz, CDCl<sub>3</sub>) δ 7.41 – 7.37 (m, 2H), 6.66 – 6.62 (m, 2H), 4.21 (s, 2H, –NH<sub>2</sub>). <sup>13</sup>C{<sup>1</sup>H} NMR (100 MHz, CDCl<sub>3</sub>) δ 150.5, 133.8, 120.2, 114.5, 100.0.</p>                          |
|  <p><b>2-(1<i>H</i>-tetrazol-5-yl)pyridine</b></p>       | <p><b>4d<sup>1</sup>:</b> Light solid. <sup>1</sup>H NMR (400 MHz, DMSO-<i>d</i><sub>6</sub>) δ 8.74 (m, 1H), 8.20 – 8.16 (m, 1H), 8.02 (m, 1H), 7.57 (m, 1H). <sup>13</sup>C{<sup>1</sup>H} NMR (100 MHz, DMSO-<i>d</i><sub>6</sub>) δ 155.3, 150.5, 144.1, 138.6, 126.5, 123.0.</p>                  |
|  <p><b>5-(4-chlorophenyl)-1<i>H</i>-tetrazole</b></p>  | <p><b>4e<sup>1</sup>:</b> Off-white solid. <sup>1</sup>H NMR (400 MHz, DMSO-<i>d</i><sub>6</sub>) δ 8.06 – 7.99 (m, 2H), 7.71 – 7.62 (m, 2H). <sup>13</sup>C{<sup>1</sup>H} NMR (100 MHz, DMSO-<i>d</i><sub>6</sub>) δ 155.3, 136.4, 130.0, 129.2, 123.7.</p>                                          |
|  <p><b>5-(<i>p</i>-tolyl)-1<i>H</i>-tetrazole</b></p>  | <p><b>4f<sup>3</sup>:</b> White solid. <sup>1</sup>H NMR (400 MHz, DMSO-<i>d</i><sub>6</sub>) δ 8.18 (d, <i>J</i> = 8.0 Hz, 2H), 8.05 (d, <i>J</i> = 8.0 Hz, 2H). <sup>13</sup>C{<sup>1</sup>H} (100 MHz, DMSO-<i>d</i><sub>6</sub>) δ 155.8, 133.8, 129.3, 128.1, 118.7, 113.9.</p>                   |
|  <p><b>5-(4-methoxyphenyl)-1<i>H</i>-tetrazole</b></p> | <p><b>4g<sup>4</sup>:</b> Light yellow solid. <sup>1</sup>H NMR (400 MHz, DMSO-<i>d</i><sub>6</sub>) δ 7.98 – 7.94 (m, 2H), 7.16 – 7.12 (m, 2H), 3.82 (s, 3H, –OCH<sub>3</sub>). <sup>13</sup>C{<sup>1</sup>H} NMR (100 MHz, DMSO-<i>d</i><sub>6</sub>) δ 162.0, 155.4, 129.2, 116.1, 115.4, 55.8.</p> |
|  <p><b>5-(4-iodophenyl)-1<i>H</i>-tetrazole</b></p>    | <p><b>4h<sup>5</sup>:</b> Light brown solid. <sup>1</sup>H NMR (400 MHz, DMSO-<i>d</i><sub>6</sub>) δ 7.97 (d, <i>J</i> = 8.2 Hz, 2H), 7.79 (d, <i>J</i> = 8.3 Hz, 2H). <sup>13</sup>C{<sup>1</sup>H} NMR (100 MHz, DMSO-<i>d</i><sub>6</sub>) δ 138.8, 129.2, 124.2, 120.6, 98.9.</p>                 |
|  <p><b>5-(4-nitrophenyl)-1<i>H</i>-tetrazole</b></p>   | <p><b>4i<sup>1</sup>:</b> Off-white solid. <sup>1</sup>H NMR (400 MHz, DMSO-<i>d</i><sub>6</sub>) δ 8.04 – 7.98 (m, 2H), 7.66 – 7.60 (m, 2H). <sup>13</sup>C{<sup>1</sup>H} NMR (100 MHz, DMSO-<i>d</i><sub>6</sub>) δ 136.2, 130.0, 129.1, 124.1.</p>                                                 |



|                                                                                                                                                  |                                                                                                                                                                                                                                                                                                                                                              |
|--------------------------------------------------------------------------------------------------------------------------------------------------|--------------------------------------------------------------------------------------------------------------------------------------------------------------------------------------------------------------------------------------------------------------------------------------------------------------------------------------------------------------|
| 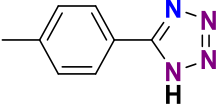 <p><b>5-(<i>p</i>-tolyl)-1<i>H</i>-tetrazole</b></p>           | <p><b>4j<sup>4</sup></b>: Light yellow solid. <sup>1</sup>H NMR (400 MHz, DMSO-<i>d</i><sub>6</sub>) δ 7.91 (d, <i>J</i> = 7.9 Hz, 2H), 7.40 (d, <i>J</i> = 7.9 Hz, 2H), 2.37 (s, 3H, -CH<sub>3</sub>). <sup>13</sup>C{<sup>1</sup>H} NMR (100 MHz, DMSO-<i>d</i><sub>6</sub>) δ 155.0, 141.1, 129.9, 126.8, 121.2, 20.9.</p>                                |
|  <p><b>5-(3-bromophenyl)-1<i>H</i>-tetrazole</b></p>            | <p><b>4k<sup>3</sup></b>: White solid. <sup>1</sup>H NMR (400 MHz, DMSO-<i>d</i><sub>6</sub>) δ 8.18 (t, <i>J</i> = 1.8 Hz, 1H), 8.02 (dt, <i>J</i> = 7.8, 1.3 Hz, 1H), 7.76 (m, 1.0 Hz, 1H), 7.54 (t, <i>J</i> = 7.9 Hz, 1H). <sup>13</sup>C{<sup>1</sup>H} NMR (100 MHz, DMSO-<i>d</i><sub>6</sub>) δ 155.2, 134.3, 132.1, 129.8, 127.2, 126.4, 122.9.</p> |
|  <p><b>1-(4-(1<i>H</i>-tetrazol-5-yl)phenyl)ethan-1-one</b></p> | <p><b>4l<sup>3</sup></b>: Light yellow solid. <sup>1</sup>H NMR (400 MHz, DMSO-<i>d</i><sub>6</sub>) δ 8.15 (d, <i>J</i> = 8.5 Hz, 2H), 8.12 (d, <i>J</i> = 8.6 Hz, 2H), 2.61 (s, 3H, -CH<sub>3</sub>). <sup>13</sup>C{<sup>1</sup>H} NMR (100 MHz, DMSO-<i>d</i><sub>6</sub>) δ 197.9, 162.8, 138.9, 129.6, 128.8, 127.7, 27.3.</p>                         |

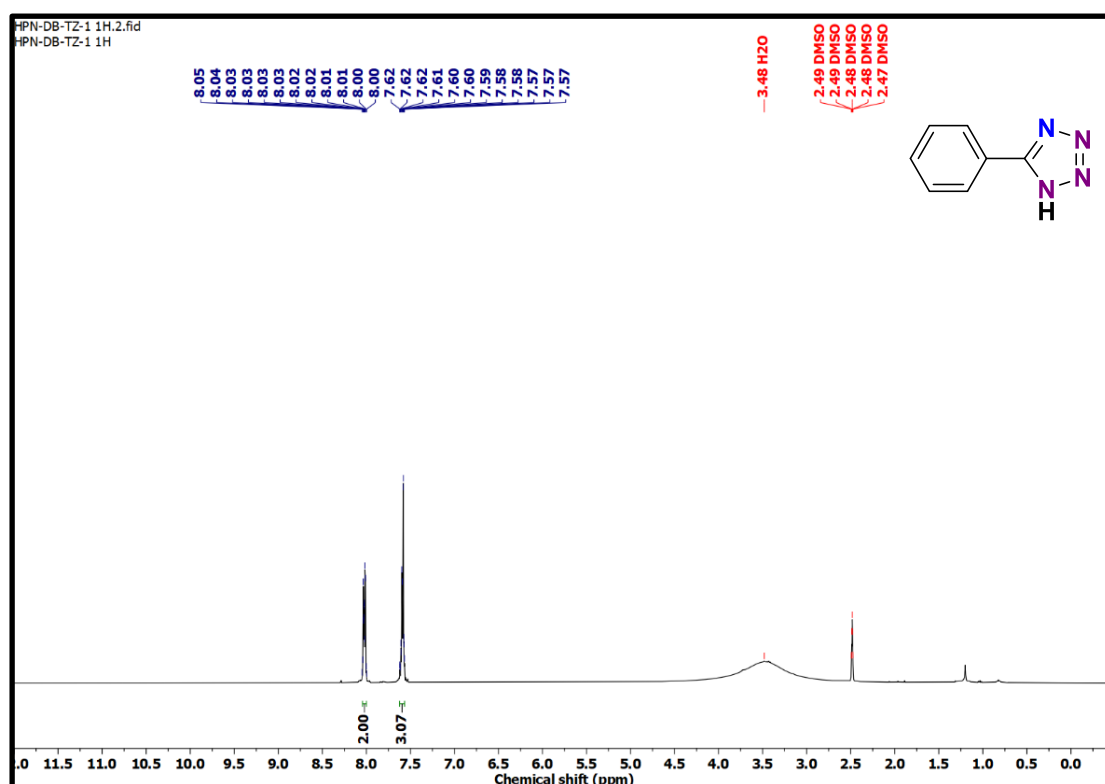

**Figure S20.** <sup>1</sup>H NMR (400 MHz, DMSO-*d*<sub>6</sub>) spectrum of **4a**.

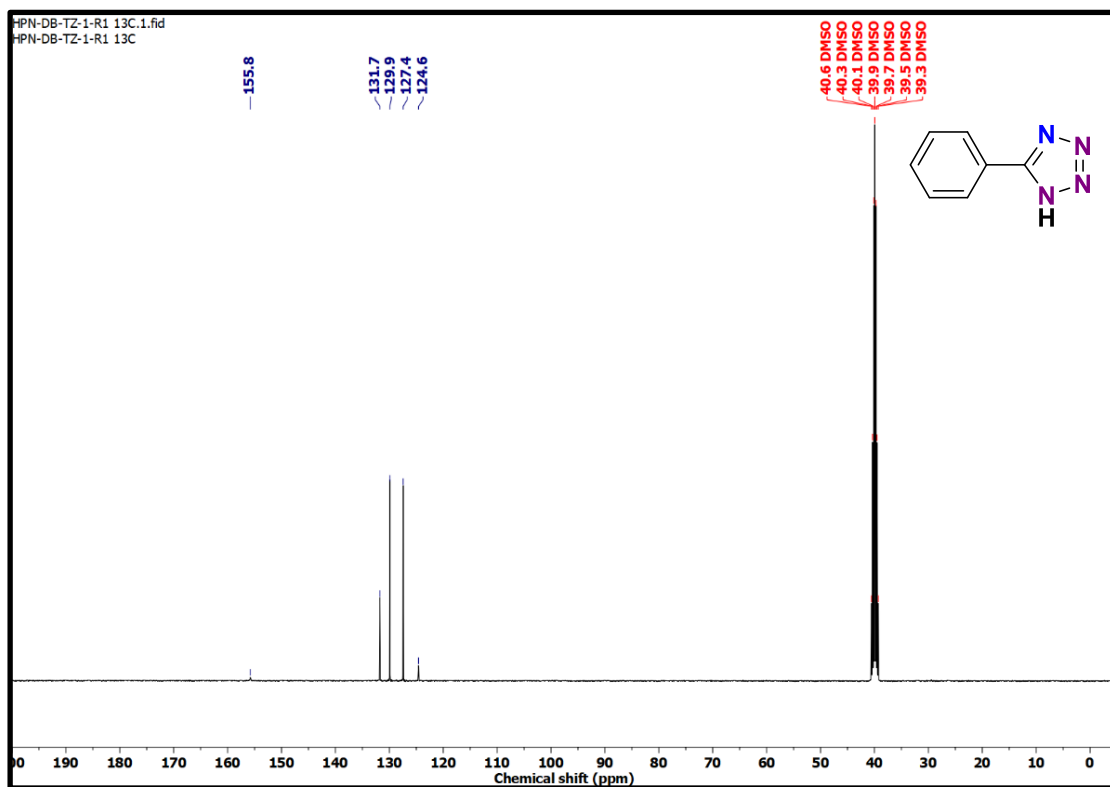

Figure S21.  $^{13}\text{C}\{^1\text{H}\}$  NMR (100 MHz,  $\text{DMSO-}d_6$ ) spectrum of **4a**.

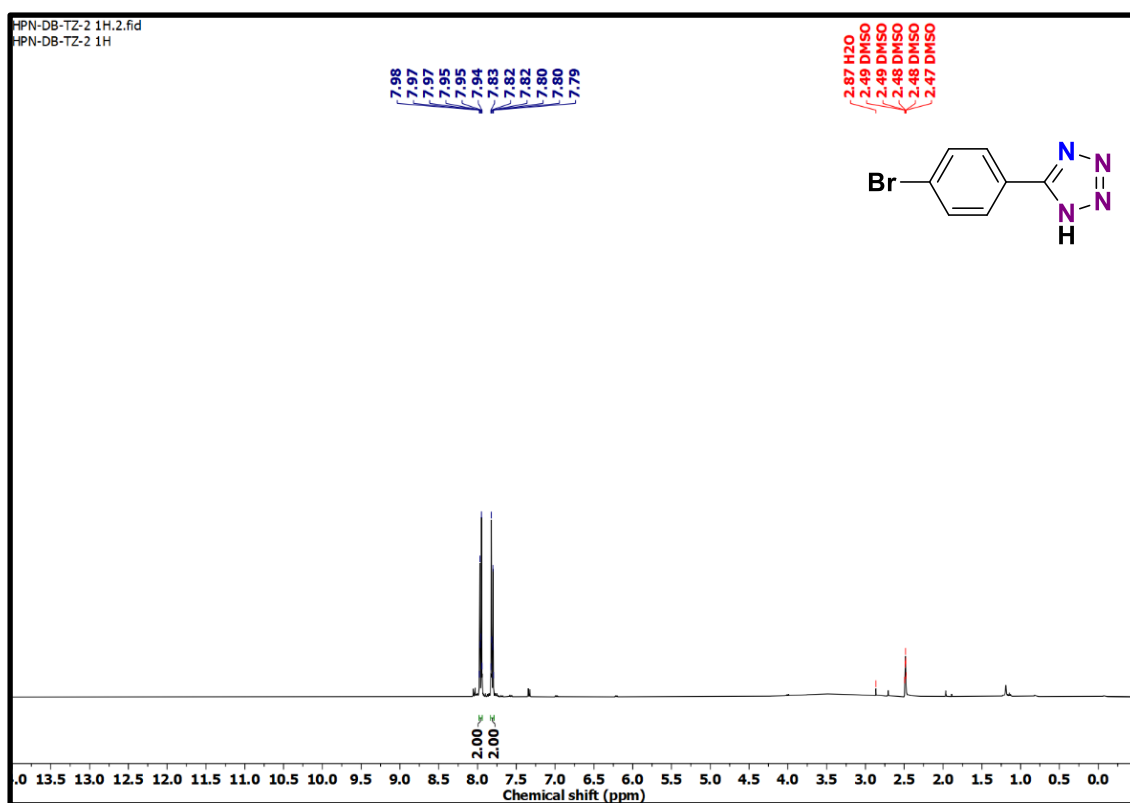

Figure S22.  $^1\text{H}$  NMR (400 MHz,  $\text{DMSO-}d_6$ ) spectrum of **4b**.

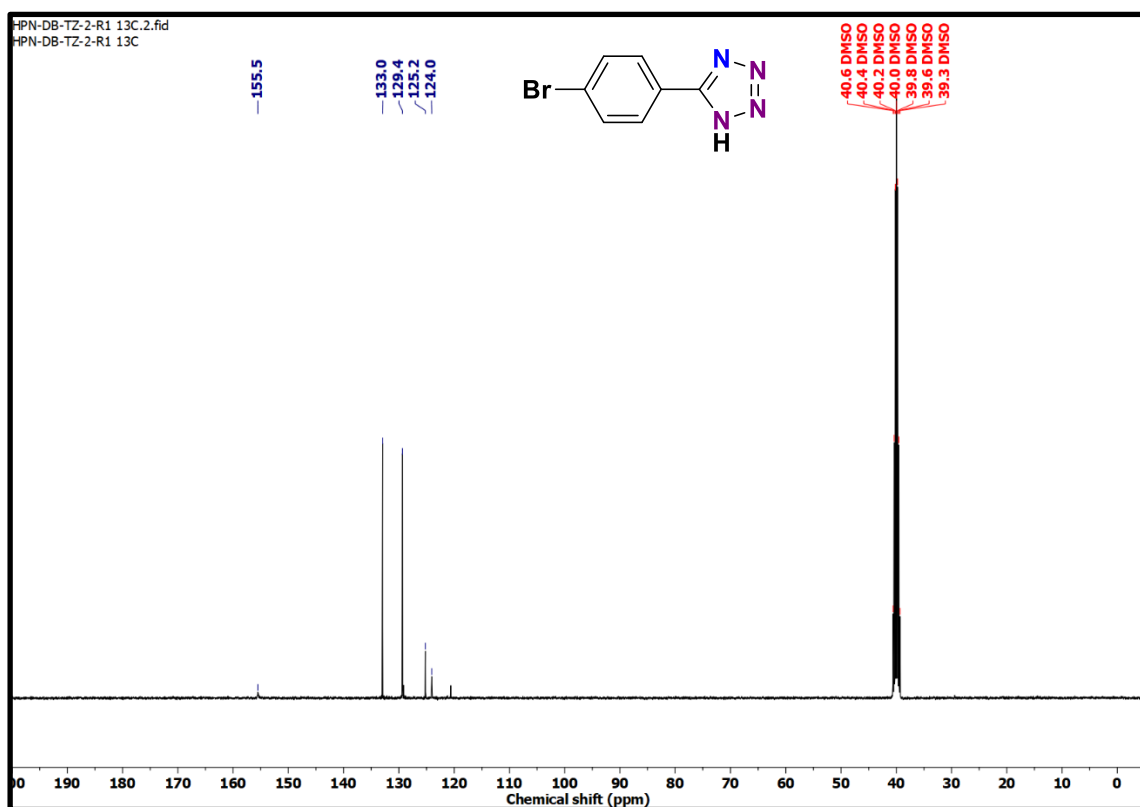

Figure S23.  $^{13}\text{C}\{^1\text{H}\}$  NMR (100 MHz,  $\text{DMSO-}d_6$ ) spectrum of **4b**.

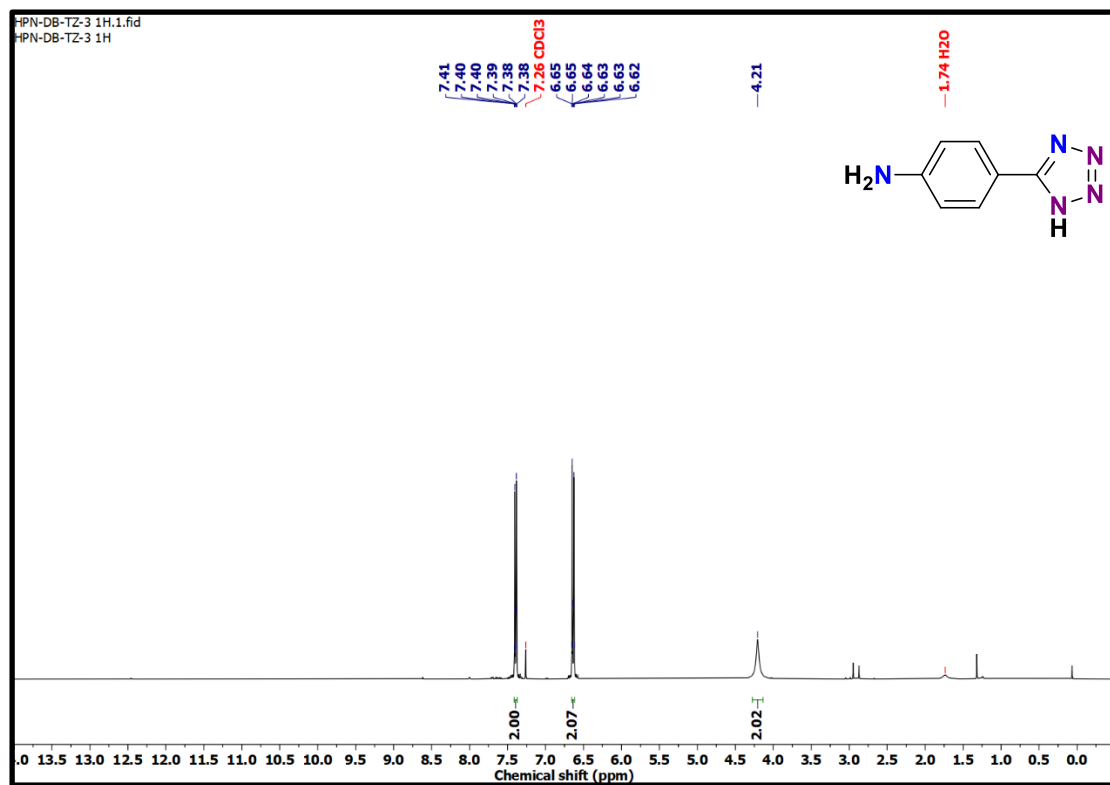

Figure S24.  $^1\text{H}$  NMR (400 MHz,  $\text{CDCl}_3$ ) spectrum of **4c**.

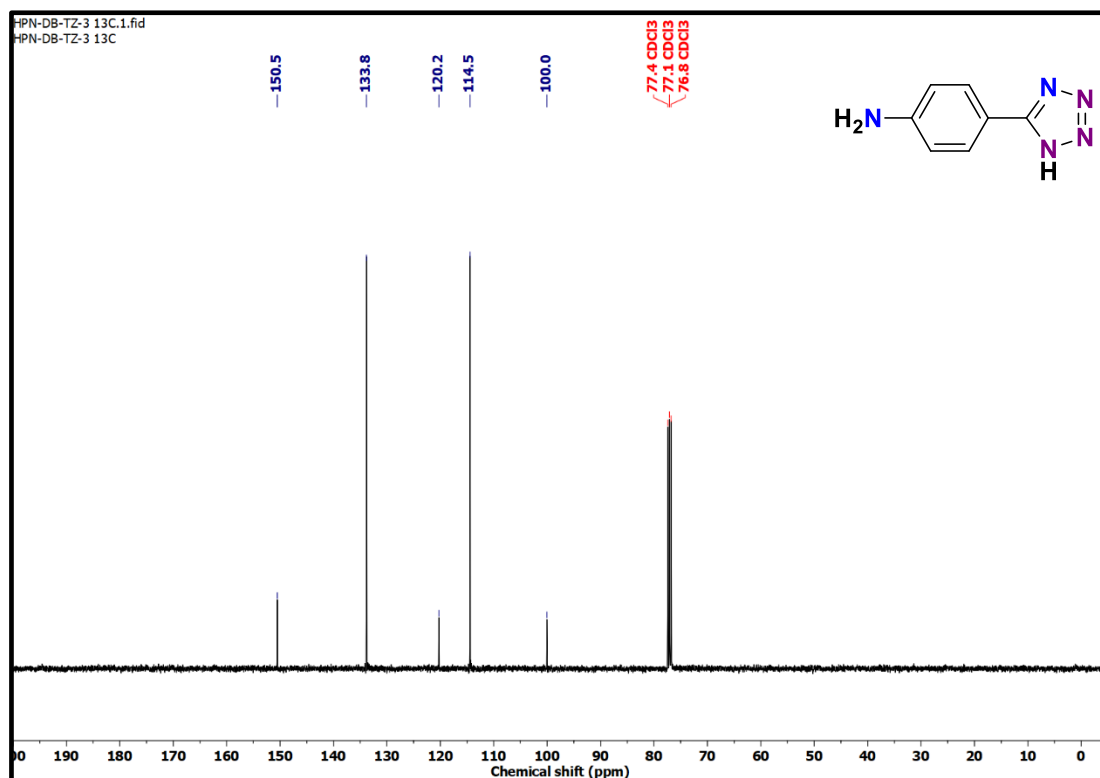

Figure S25.  $^{13}\text{C}\{^1\text{H}\}$  NMR (100 MHz,  $\text{CDCl}_3$ ) spectrum of **4c**.

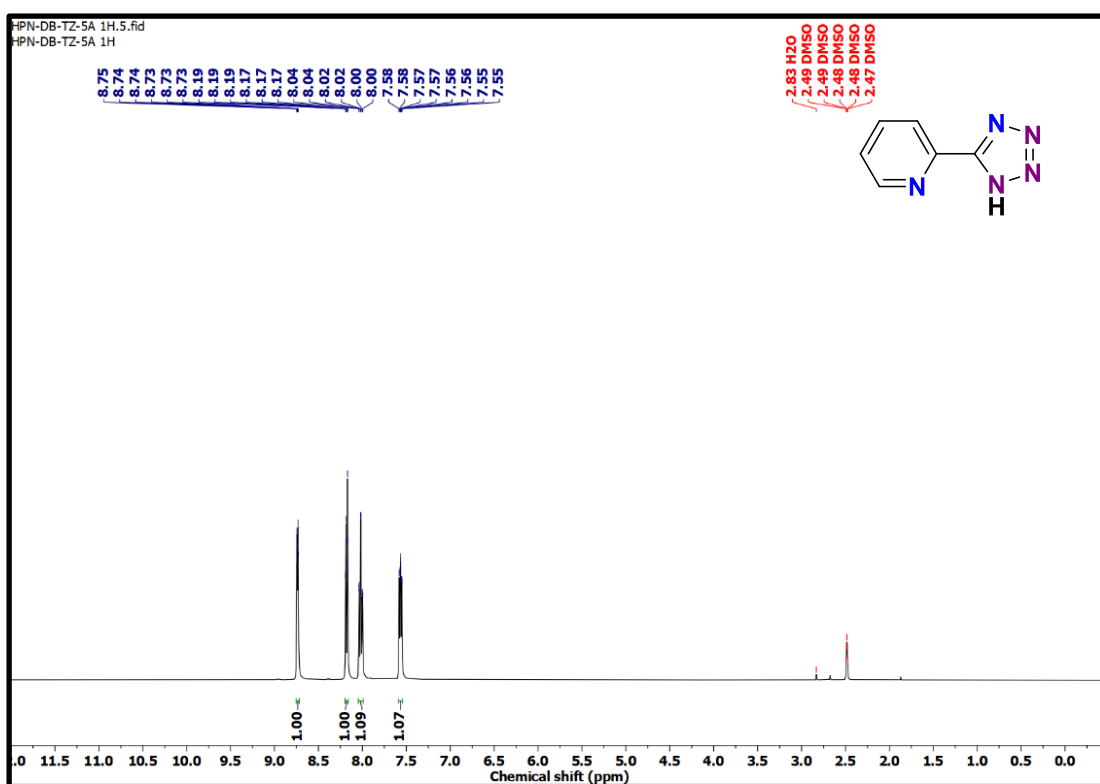

Figure S26.  $^1\text{H}$  NMR (400 MHz,  $\text{DMSO}-d_6$ ) spectrum of **4d**.

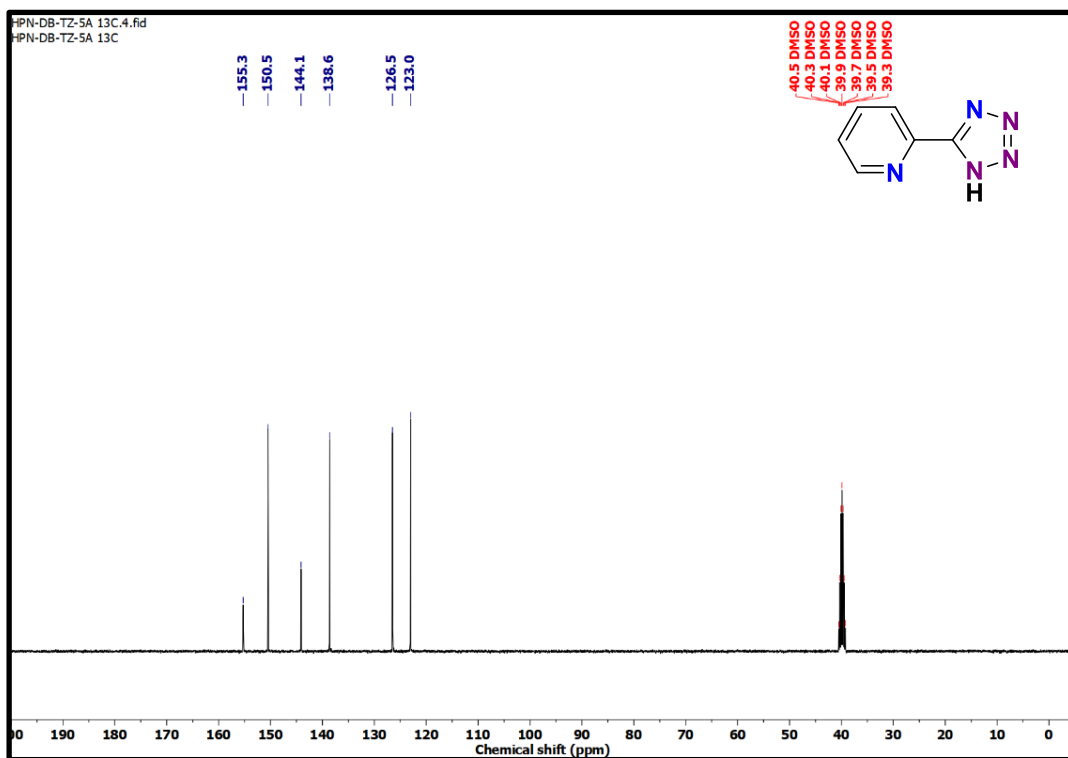

Figure S27.  $^{13}\text{C}\{^1\text{H}\}$  NMR (100 MHz,  $\text{DMSO-}d_6$ ) spectrum of 4d.

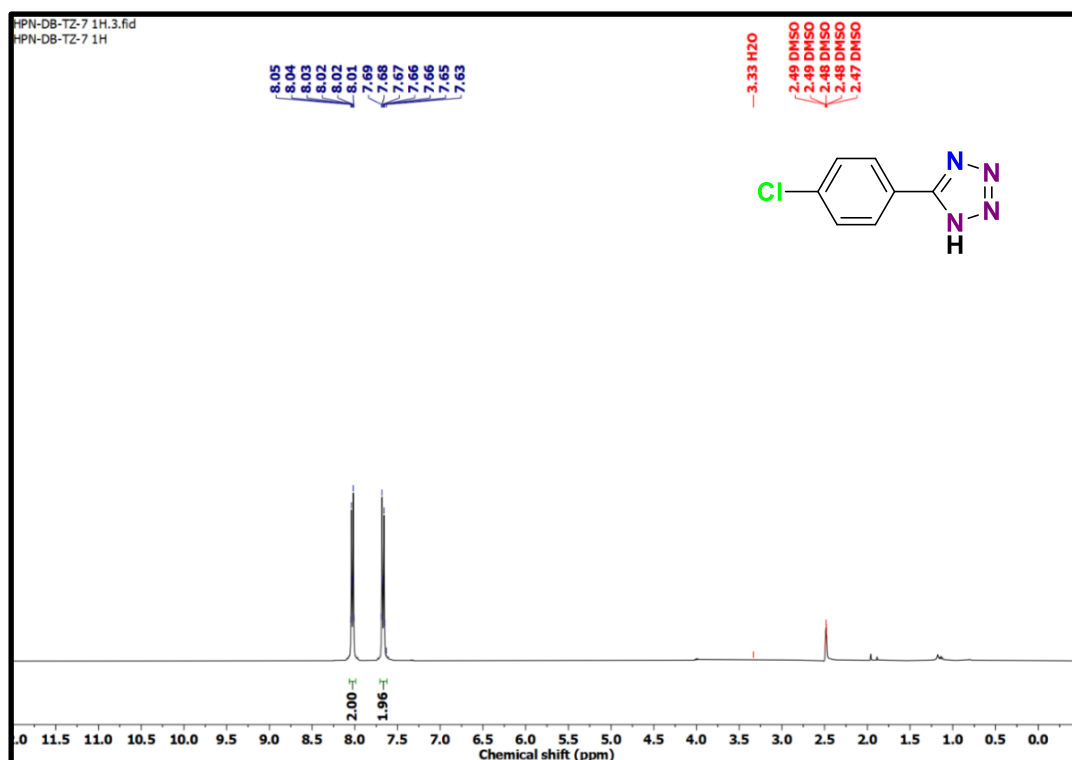

Figure S28.  $^1\text{H}$  NMR (400 MHz,  $\text{DMSO-}d_6$ ) spectrum of 4e.

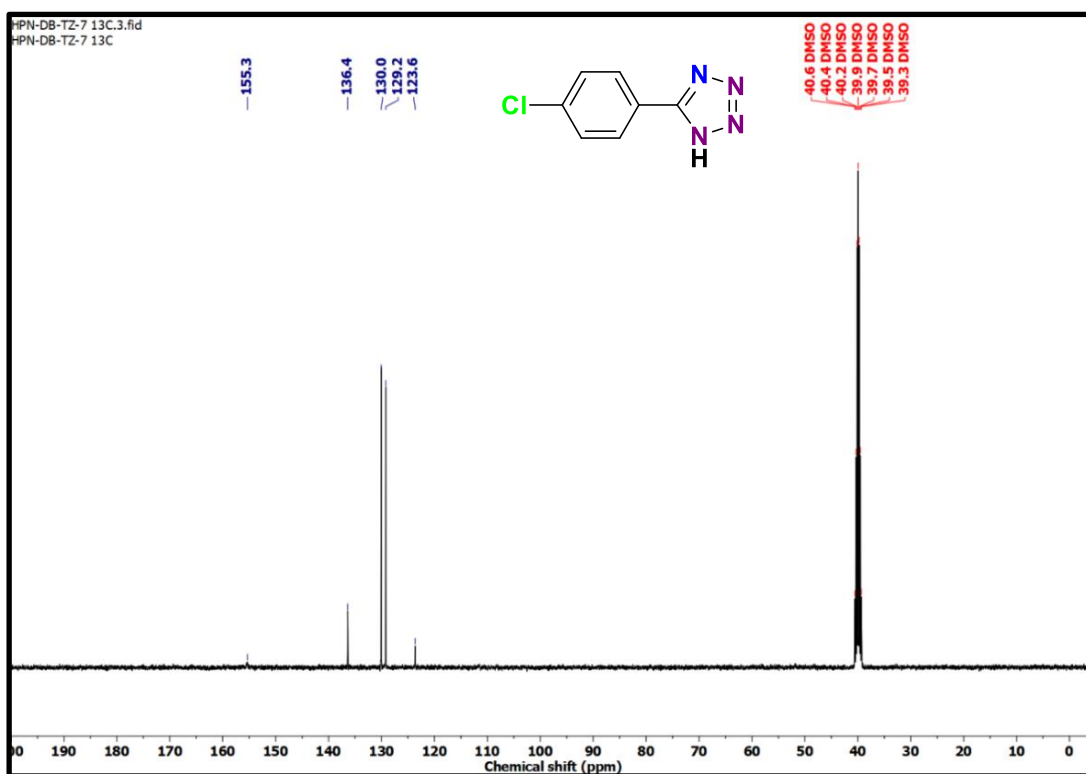

Figure S29.  $^{13}\text{C}\{^1\text{H}\}$  NMR (100 MHz,  $\text{DMSO-}d_6$ ) spectrum of 4e.

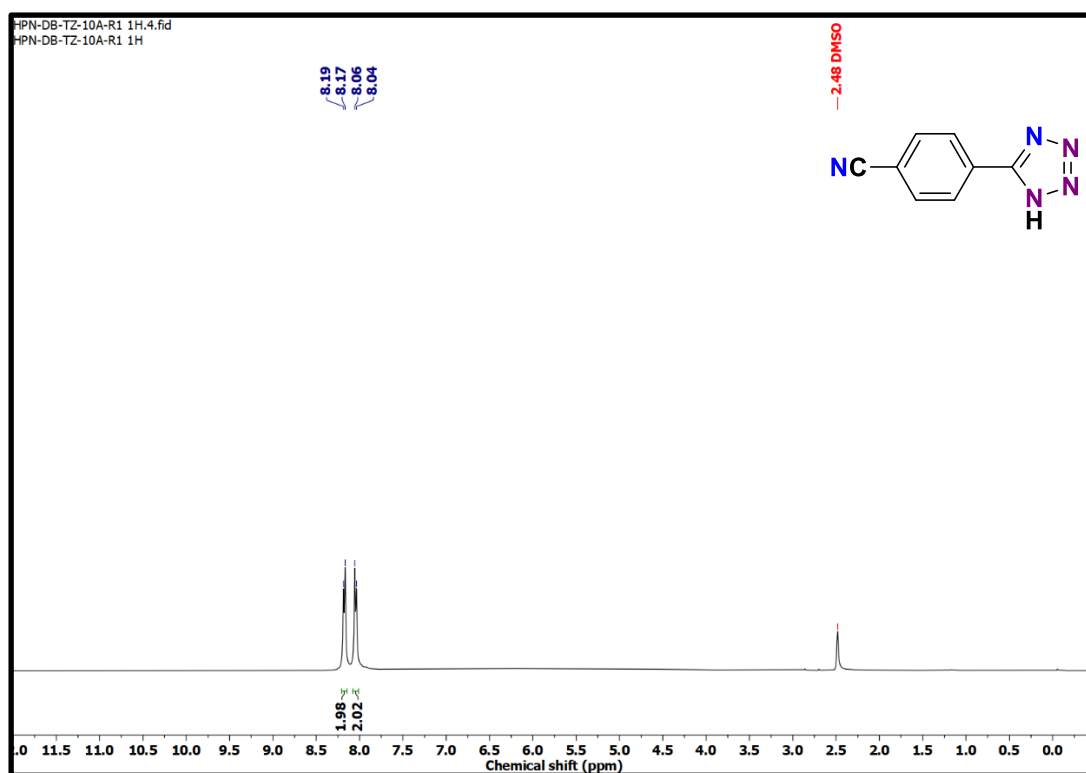

Figure S30.  $^1\text{H}$  NMR (400 MHz,  $\text{DMSO-}d_6$ ) spectrum of 4f.

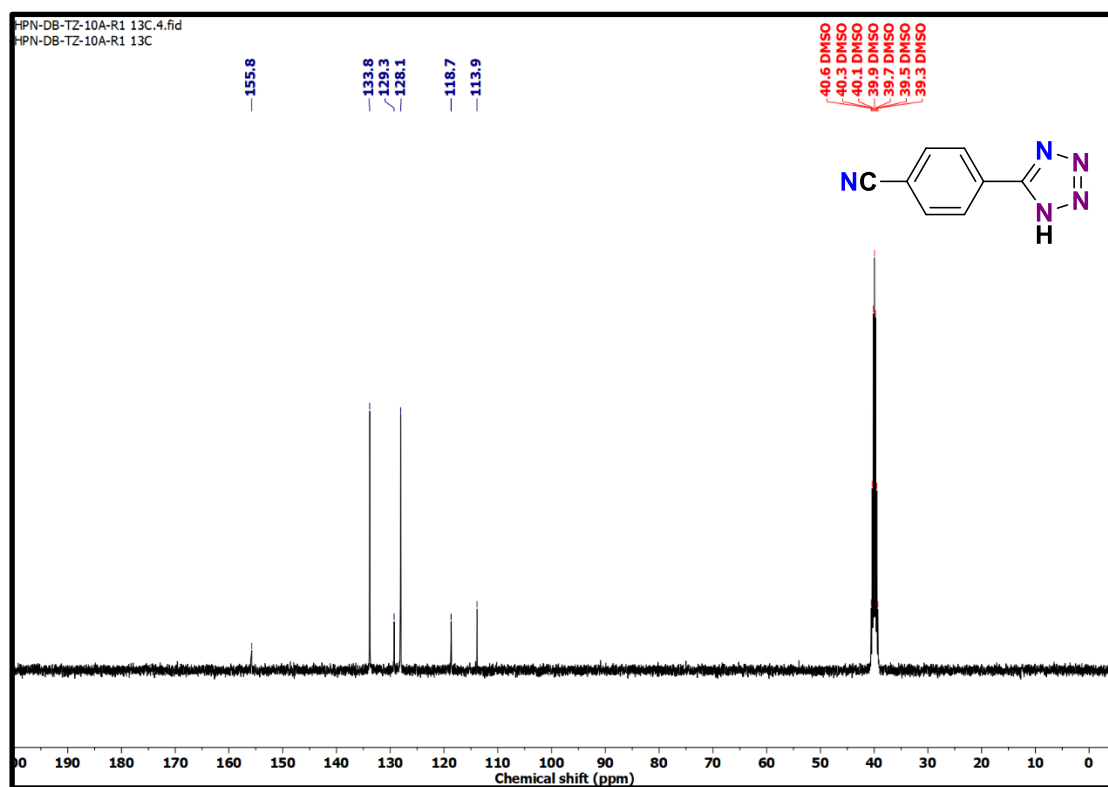

Figure S31.  $^{13}\text{C}$   $\{^1\text{H}\}$  NMR (100 MHz,  $\text{DMSO-}d_6$ ) spectrum of 4f.

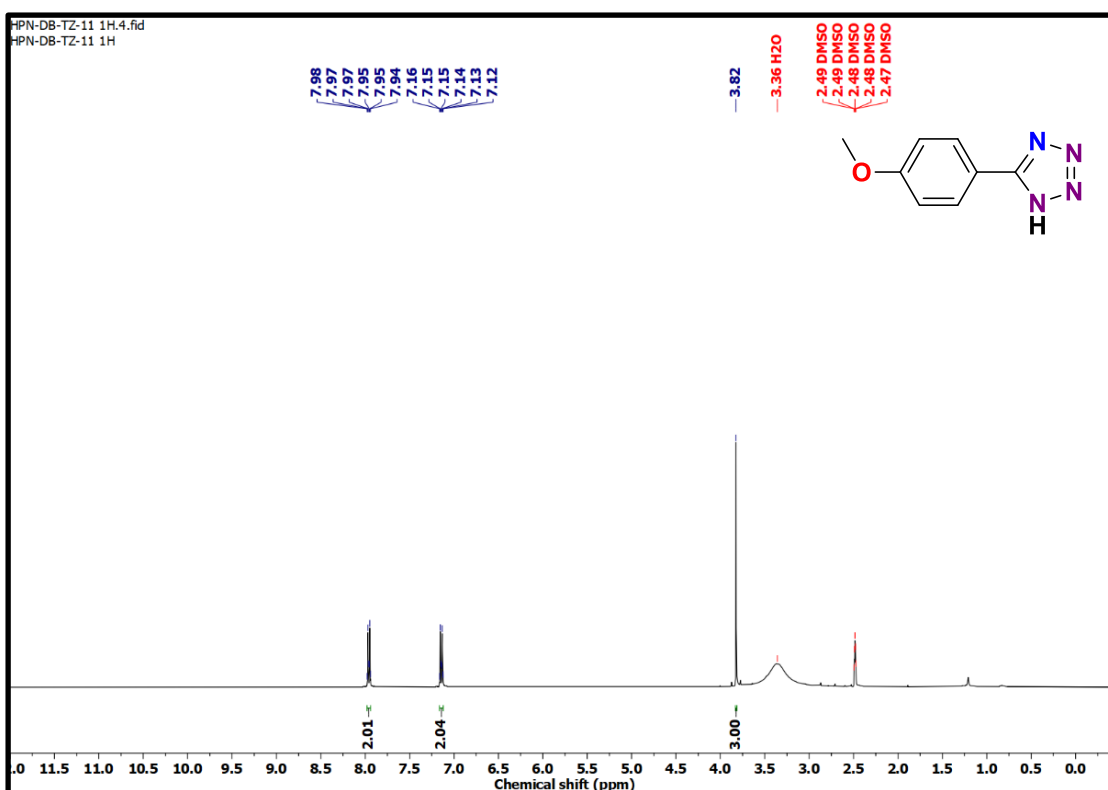

Figure S32.  $^1\text{H}$  NMR (400 MHz,  $\text{DMSO-}d_6$ ) spectrum of 4g.

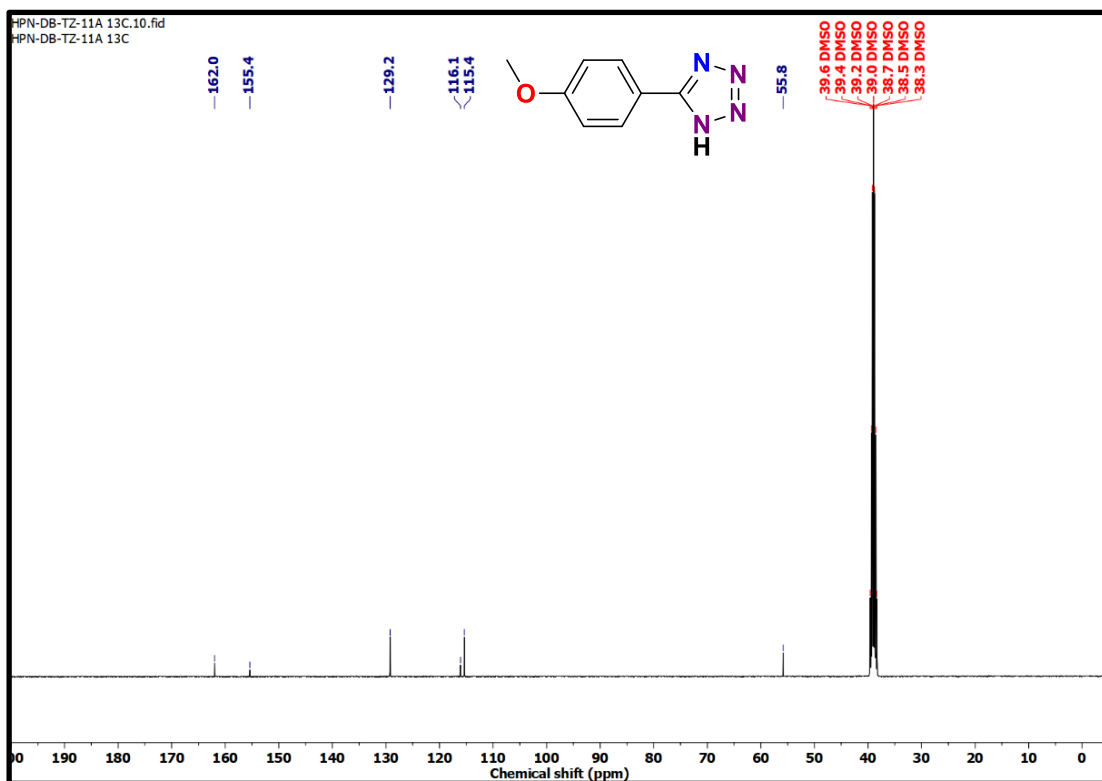

Figure S33.  $^{13}\text{C}\{^1\text{H}\}$  NMR (100 MHz,  $\text{DMSO-}d_6$ ) spectrum of **4g**.

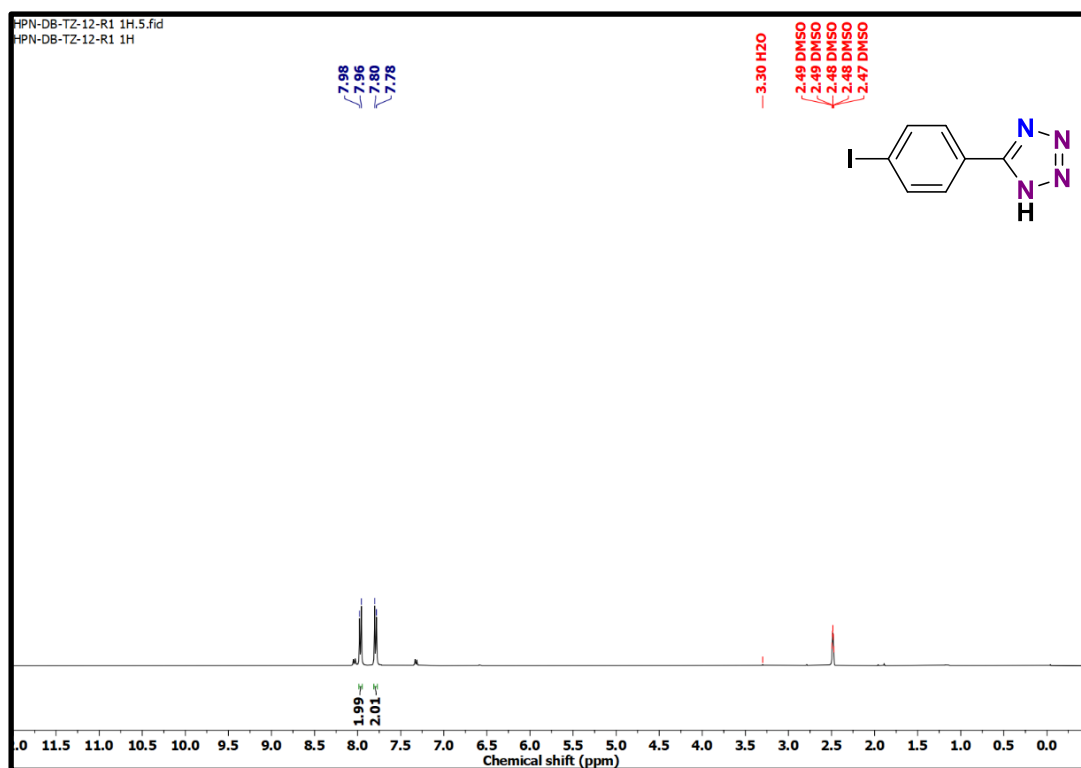

Figure S34.  $^1\text{H}$  NMR (400 MHz,  $\text{DMSO-}d_6$ ) spectrum of **4h**.



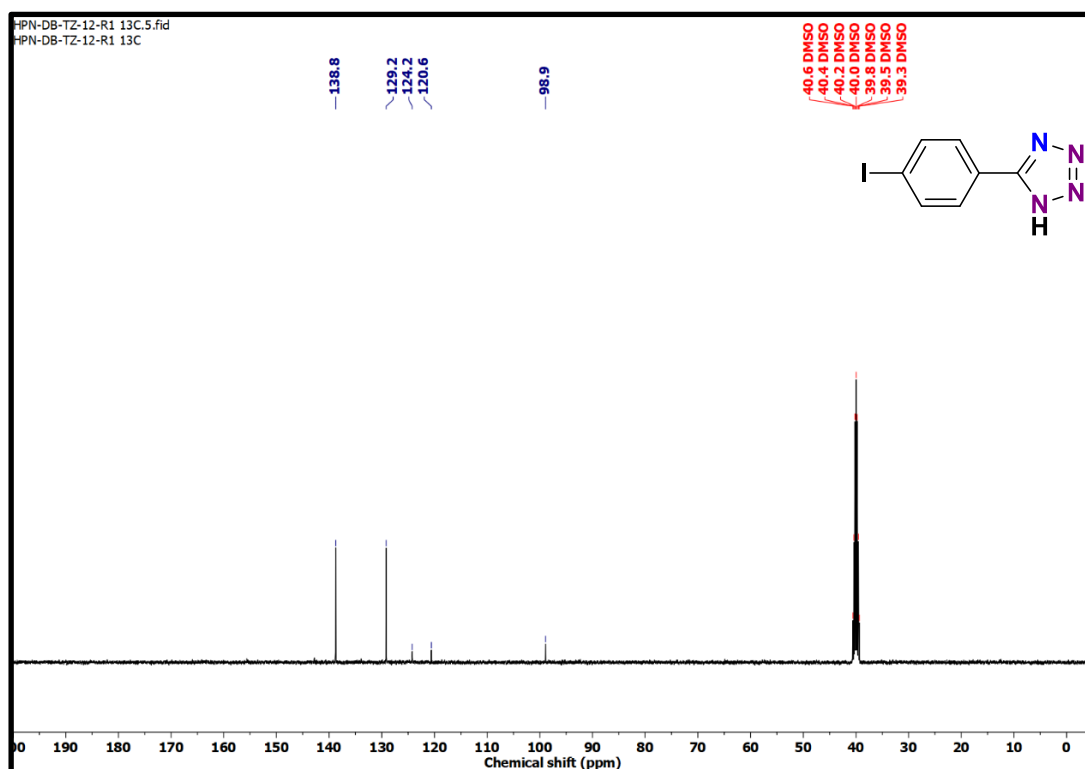

Figure S35.  $^{13}\text{C}\{^1\text{H}\}$  NMR (100 MHz,  $\text{DMSO-}d_6$ ) spectrum of 4h.

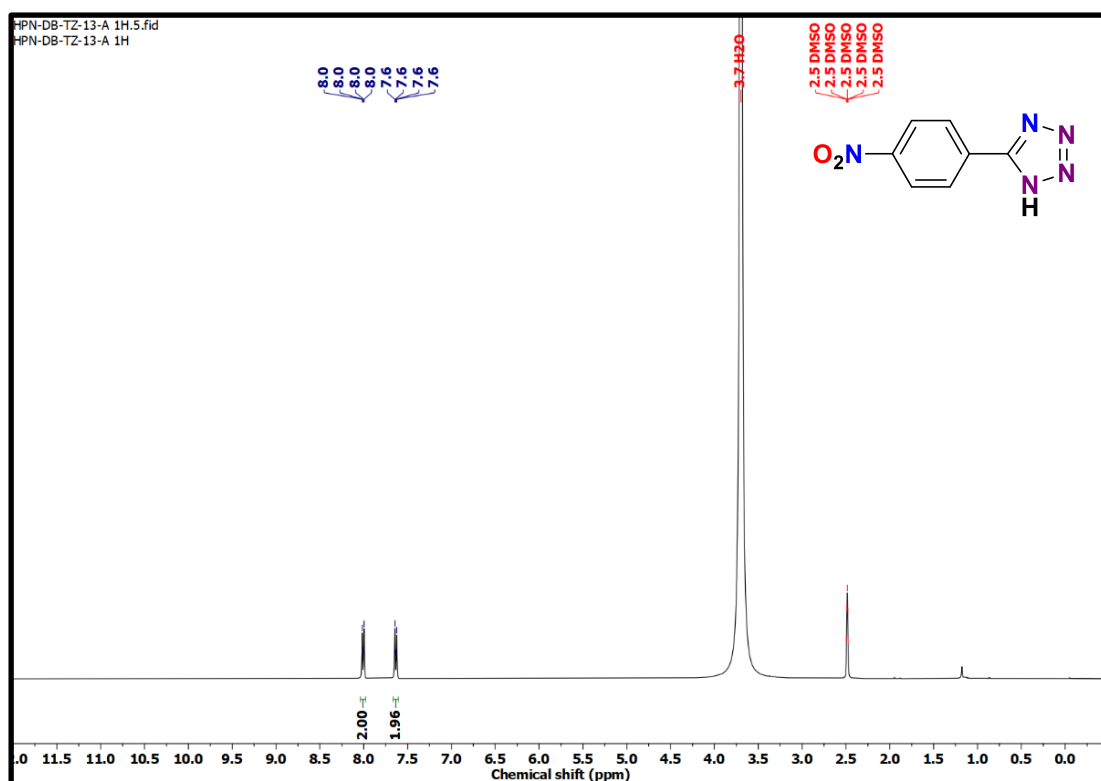

Figure S36.  $^1\text{H}$  NMR (400 MHz,  $\text{DMSO-}d_6$ ) spectrum of 4i.

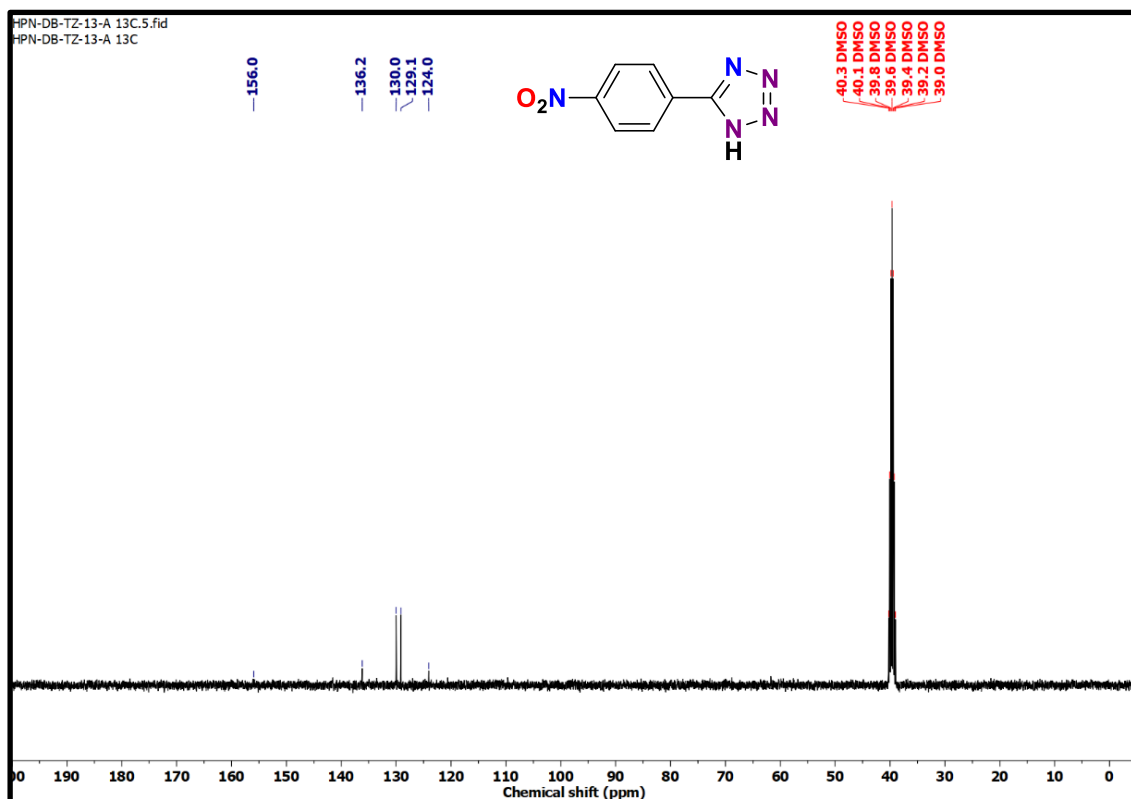

Figure S37.  $^{13}\text{C}\{^1\text{H}\}$  NMR (100 MHz,  $\text{DMSO}-d_6$ ) spectrum of **4i6**.

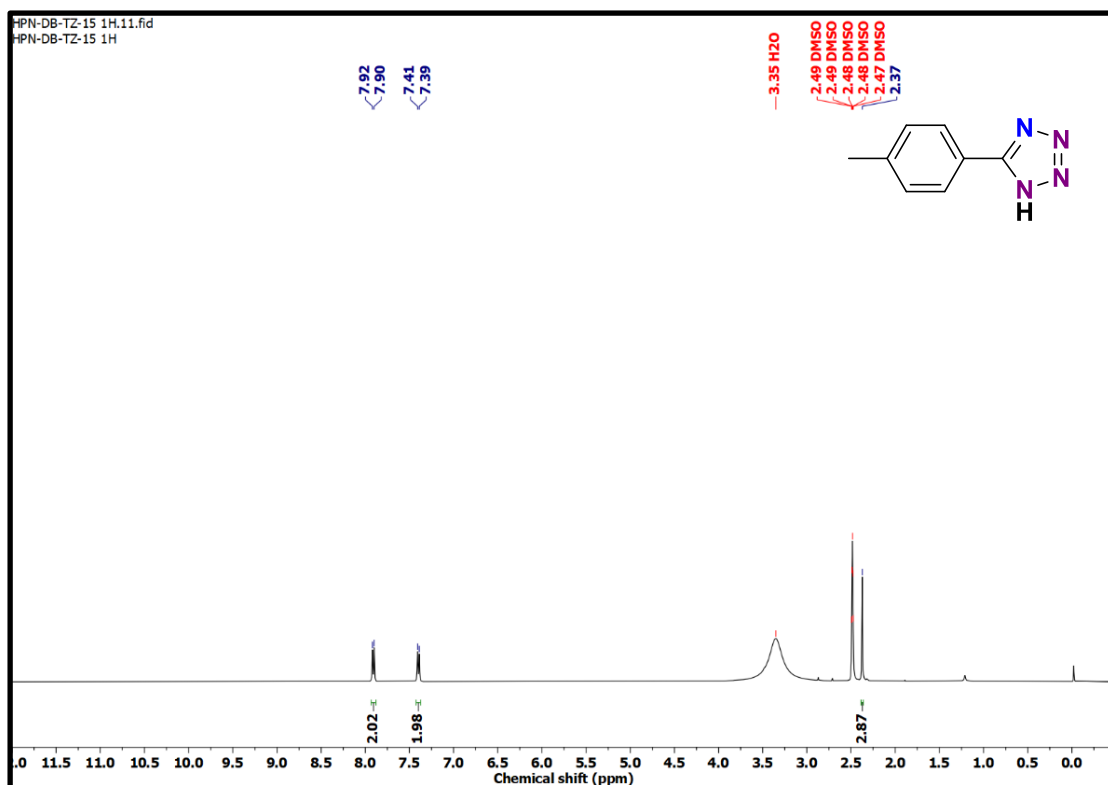

Figure S38.  $^1\text{H}$  NMR (400 MHz,  $\text{DMSO}-d_6$ ) spectrum of **4j**.

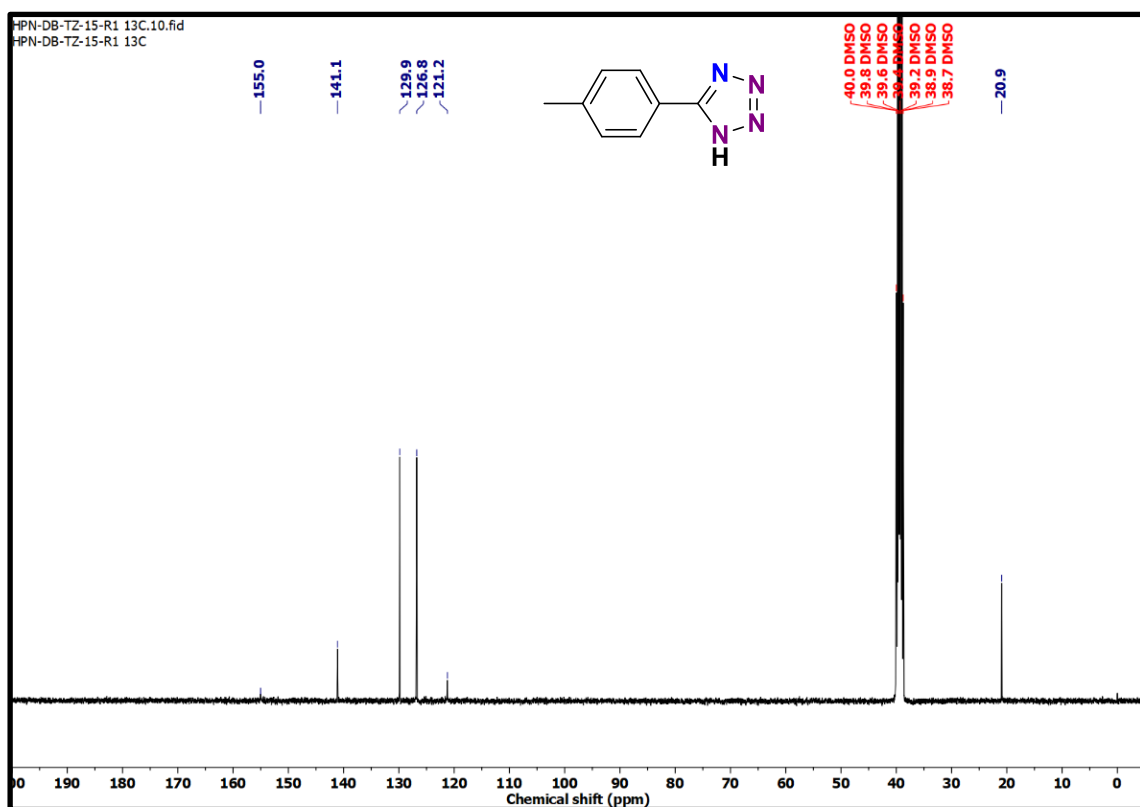

Figure S39.  $^{13}\text{C}\{^1\text{H}\}$  NMR (100 MHz,  $\text{DMSO-}d_6$ ) spectrum of **4j**.

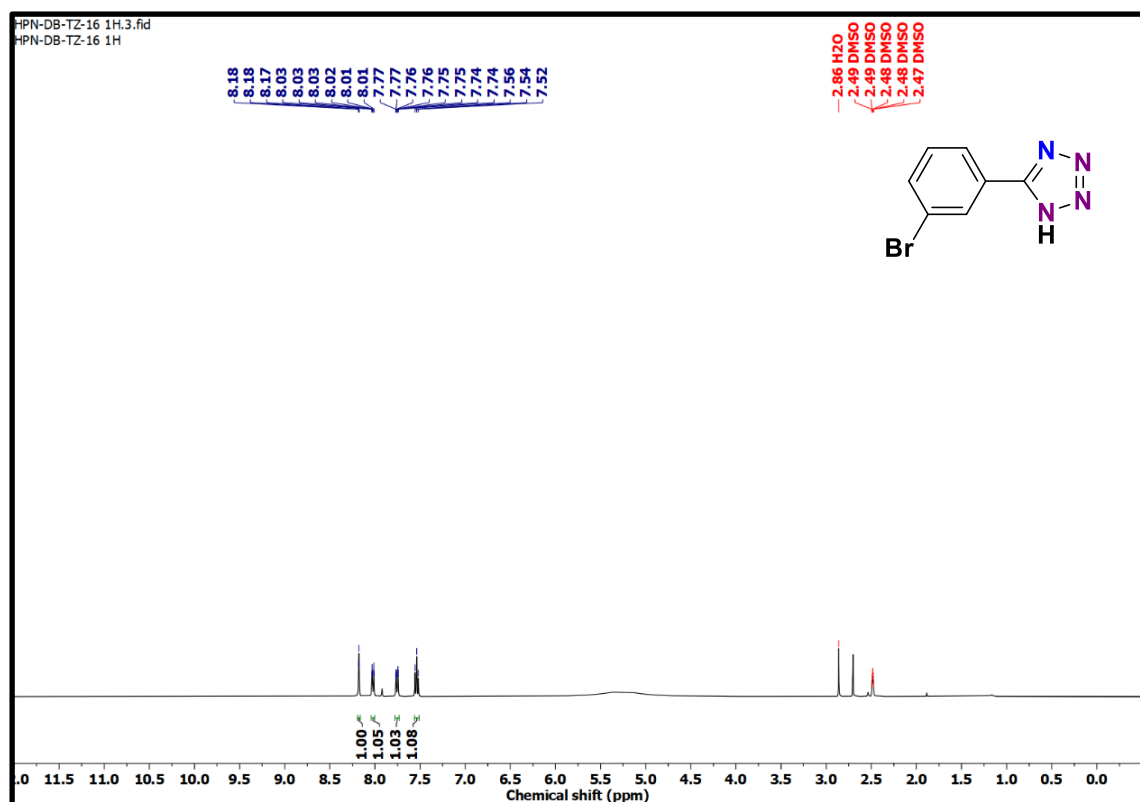

Figure S40.  $^1\text{H}$  NMR (400 MHz,  $\text{DMSO-}d_6$ ) spectrum of **4k**.

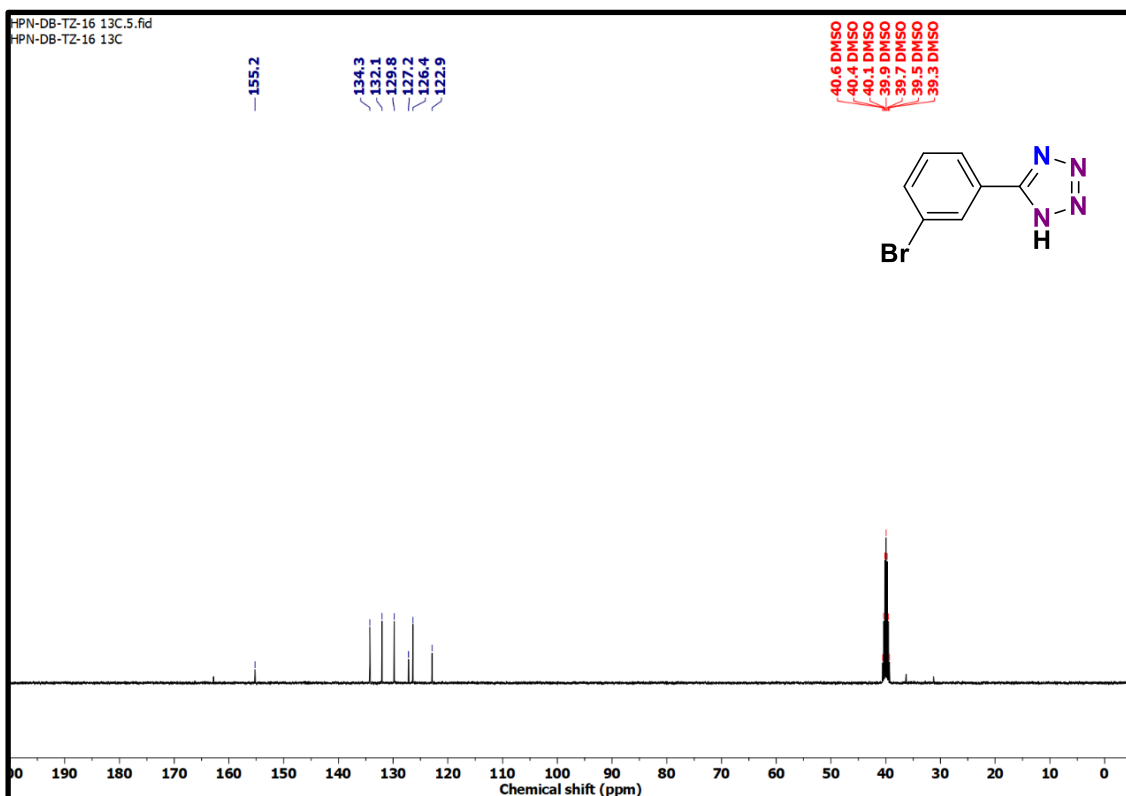

Figure S41.  $^{13}\text{C}\{^1\text{H}\}$  NMR (100 MHz,  $\text{DMSO-}d_6$ ) spectrum of **4k**.

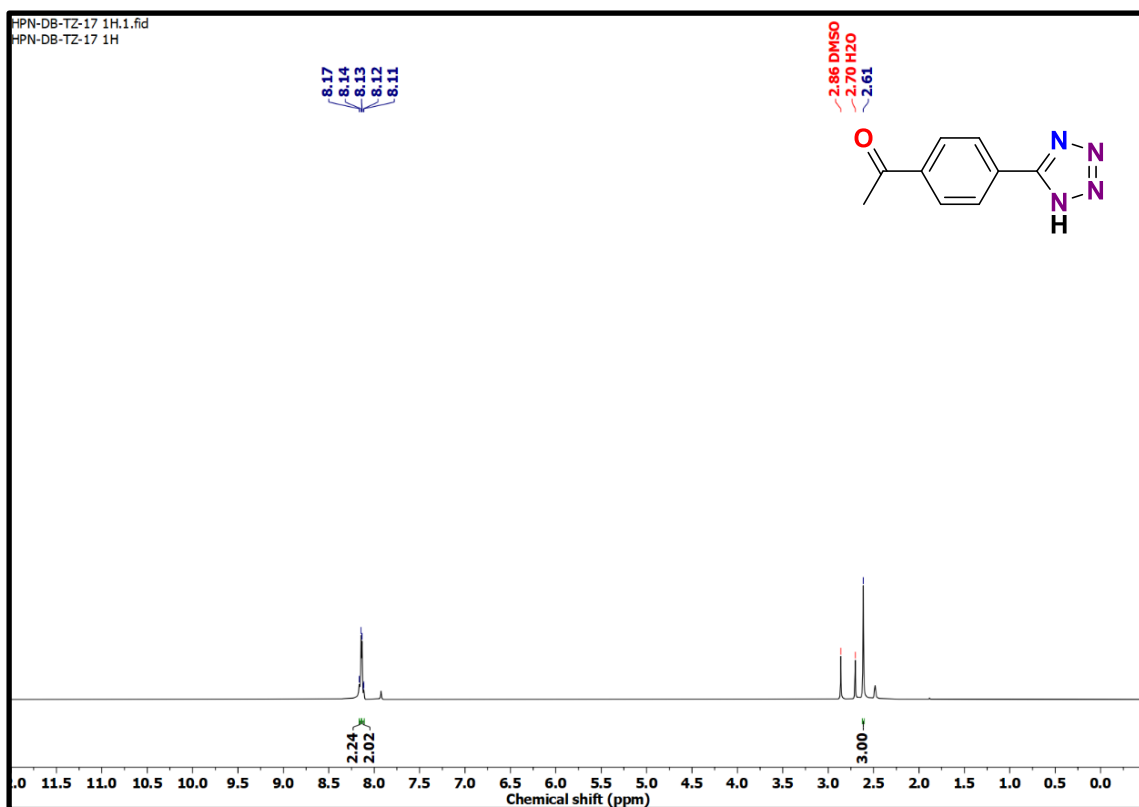

Figure S42.  $^1\text{H}$  NMR (400 MHz,  $\text{DMSO-}d_6$ ) spectrum of **4l**.

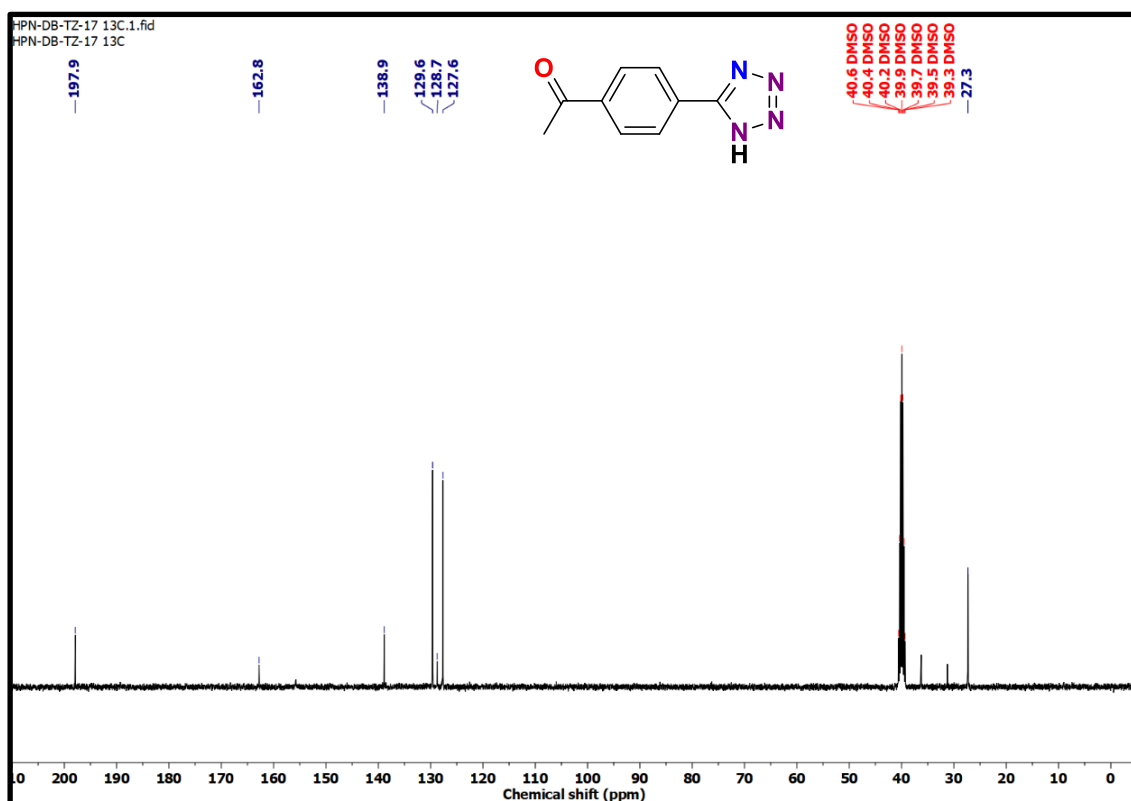

**Figure S43.**  $^{13}\text{C}\{^1\text{H}\}$  NMR (100 MHz,  $\text{DMSO-}d_6$ ) spectrum of **4l**.

## DFT Methods

Gaussian 09 package<sup>6</sup> was used to perform all the density functional theory (DFT) calculations using B3LYP-D3BJ functional<sup>7-10</sup>, where D3BJ accounted for dispersion correction using a combination of D3 and Becke–Johnson damping scheme. Pople style basis set 6-311+G(d,p)<sup>11-14</sup> was used for all gas phase geometric optimizations and frequency calculations under harmonic approximation at 373.15 K. Each intermediate and transition state was classified by the absence and presence of a single imaginary frequency in the optimized geometry respectively. A pruned (99, 590) grid (Gaussian’s ultrafine grid option) was used for computing numerical integrals, and convergence cutoffs on forces and step size during optimization were set using the opt=tight option enabled. Corroboration of the transition state between the reactant and product state was verified using intrinsic reaction calculation.<sup>15</sup> The thermochemistry of each stationary state was worked out using the results of the frequency calculations. The obtained Free energy was refined further by considering the errors associated with the rigid rotor harmonic oscillator (RRHO) approximation considered during the frequency calculations using Truhlar’s quasi-harmonic approximation<sup>16</sup> for vibrational entropy. During the correction, performed using GoodVibes code,<sup>17</sup> all the vibrational frequencies  $< 100\text{ cm}^{-1}$  were scaled to  $100\text{ cm}^{-1}$ .

Gibbs free energy of gas phase  $\text{H}^+$  ( $G(\text{H}^+)$ ) was computed using the method described in Moser *et al.*<sup>18</sup> using equations 1, 2,<sup>19</sup> and 3.

$$\text{Enthalpy } H(H^+) = \frac{5}{2}RT \text{ (Equation 1)}$$

$$\text{Entropy } S(H^+) = R \ln \left( \frac{e^{\frac{5}{2}} k_b T}{p \Lambda^3} \right) \text{ (Equation 2)}$$

$$G(H^+) = H(H^+) - TS(H^+) \text{ (Equation 3)}$$

where  $k_b$  is the Boltzmann constant,  $\Lambda$  is the thermal de Broglie wavelength,  $h$  is the Planck's constant, and  $m$  is the proton's mass. The values of  $H(H^+)$  and  $S(H^+)$  were found to be 1.85 kcal/mol and 27.13 cal/(mol. K) under standard state conditions, resulting in  $G(H^+) = -8.27$  kcal/mol. Gauss View 5.0.9 program<sup>20</sup> was used for input file preparation, visualization and analysis purposes.

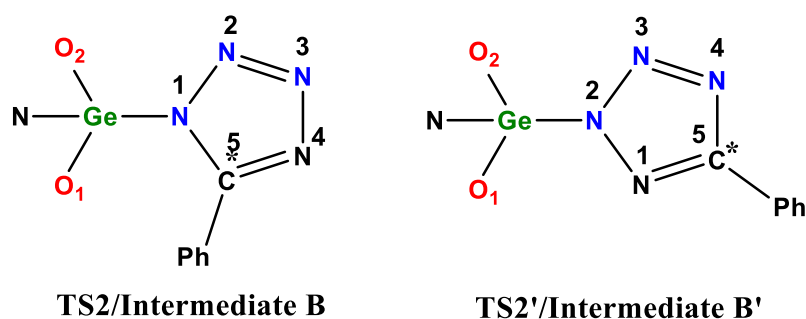

**Figure S44.** 1,5-disubstituted intermediate (**B**) and 2,5-disubstituted Intermediate (**B'**) with numbering scheme in Path I and Path II.

**Table S4.** Bond Lengths present in various stationary states. All values are reported in Å.

|       | Compound 1 | TS1  | A    | PhCN | N <sub>3</sub> <sup>-</sup> | TS2  | TS2' | B    | B'   | Product |
|-------|------------|------|------|------|-----------------------------|------|------|------|------|---------|
| Ge-N  | 2.02       | 2.13 | 2.13 | -    | -                           | 2.13 | 2.13 | 2.11 | 2.12 | -       |
| Ge-O1 | 2.0        | 1.96 | 2.09 | -    | -                           | 2.04 | 2.0  | 2.03 | 2.01 | -       |
| Ge-O2 | 1.97       | 1.91 | 2.03 | -    | -                           | 2.09 | 2.04 | 2.08 | 2.06 | -       |
| Ge-N1 | -          | 2.93 | 2.02 | -    | -                           | 2.05 | -    | 2.09 | -    | -       |
| Ge-N2 | -          | 2.93 | 2.02 | -    | -                           | -    | 2.10 | -    | 2.09 | -       |
| *C-N4 | -          | -    | -    | 1.16 | -                           | 1.2  | -    | 1.33 | -    | 1.35    |
| *C-N1 | -          | -    | -    | 1.16 | -                           | -    | 1.20 | -    | 1.33 | 1.35    |

|           |   |      |      |   |      |      |      |      |      |      |
|-----------|---|------|------|---|------|------|------|------|------|------|
| N1-<br>N2 | - | 1.18 | 1.2  | - | 1.18 | 1.25 | -    | 1.35 | -    | 1.36 |
| N2-<br>N3 | - | 1.18 | 1.2  | - | 1.18 | -    | 1.2  | -    | 1.33 | 1.36 |
| N2-<br>N3 | - | 1.18 | 1.15 | - | 1.18 | 1.17 | -    | 1.3  | -    | 1.29 |
| N3-<br>N4 | - | 1.18 | 1.15 | - | 1.18 | -    | 1.2  | -    | 1.32 | 1.29 |
| N3-<br>N4 | - | -    | -    | - | -    | 2.07 | -    | 1.35 | -    | 1.35 |
| N1-<br>*C | - | -    | -    | - | -    | 1.89 | -    | 1.36 | -    | 1.32 |
| N4-<br>*C | - | -    | -    | - | -    | -    | 1.82 | -    | 1.36 | 1.32 |
| N1-<br>N2 | - | -    | -    | - | -    | -    | 2.18 | -    | 1.33 | 1.35 |

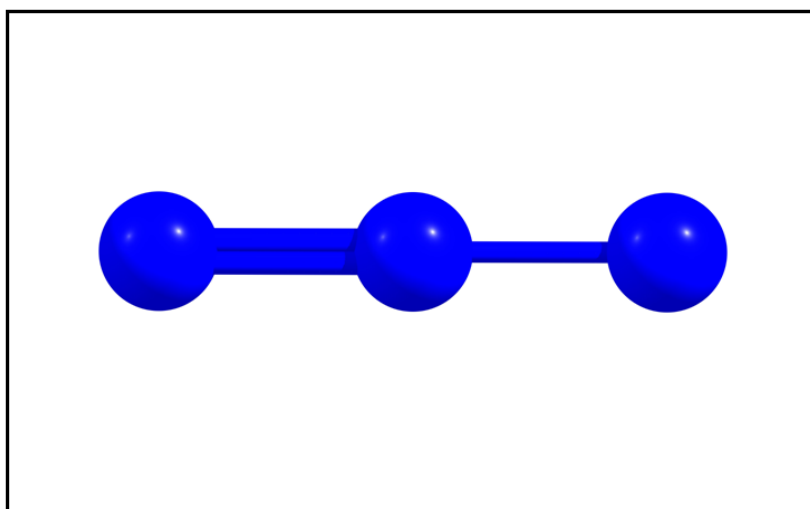

**Figure S45.** DFT-optimized geometry of azide ion.

**Table S5.** Cartesian coordinates of DFT-optimized geometry of azide ion.

$\text{N}_3^-$

|   |            |            |             |
|---|------------|------------|-------------|
| N | 0.00000000 | 0.00000000 | 0.00000000  |
| N | 0.00000000 | 0.00000000 | 1.18320600  |
| N | 0.00000000 | 0.00000000 | -1.18320600 |

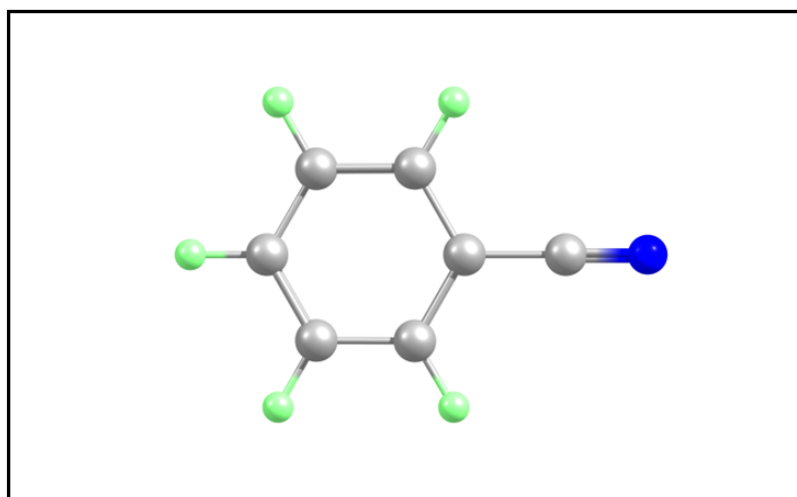

**Figure S46.** DFT-optimized geometry of benzonitrile.

**Table S6.** Cartesian coordinates of DFT-optimized geometry of benzonitrile.

C<sub>7</sub>H<sub>5</sub>N

|   |             |             |            |
|---|-------------|-------------|------------|
| C | 0.00000000  | -0.60943600 | 0.00000000 |
| C | 1.21485200  | 0.08972700  | 0.00000000 |
| C | 1.20845100  | 1.47948100  | 0.00000000 |
| C | 0.00000000  | 2.17488500  | 0.00000000 |
| C | -1.20845100 | 1.47948100  | 0.00000000 |
| C | -1.21485200 | 0.08972700  | 0.00000000 |
| H | 2.14746800  | -0.45992800 | 0.00000000 |
| H | 2.14706600  | 2.02021000  | 0.00000000 |
| H | 0.00000000  | 3.25841100  | 0.00000000 |
| H | -2.14706600 | 2.02021000  | 0.00000000 |
| H | -2.14746800 | -0.45992800 | 0.00000000 |
| C | 0.00000000  | -2.03960500 | 0.00000000 |
| N | 0.00000000  | -3.19493300 | 0.00000000 |



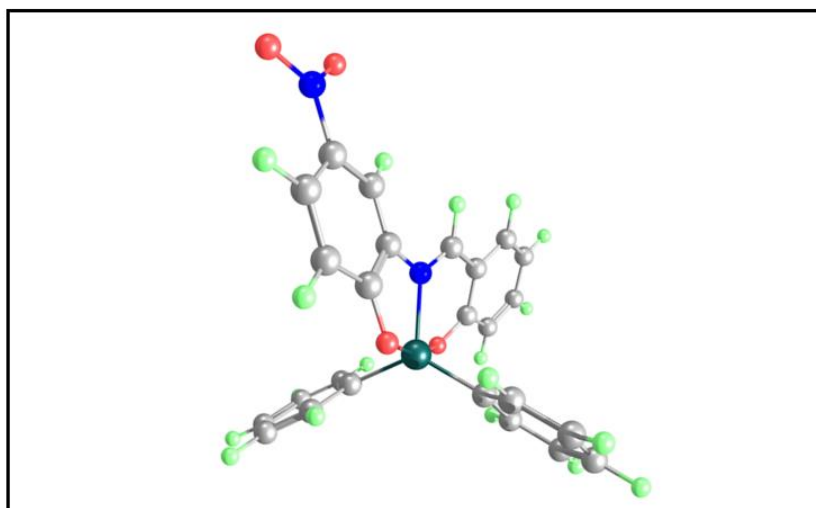

**Figure S47.** DFT-optimized geometry of compound 1.

**Table S7.** Cartesian coordinates of DFT-optimized geometry of compound 1 [Ge(IV) compound].

C<sub>25</sub>H<sub>18</sub>N<sub>2</sub>O<sub>4</sub>Ge

|    |             |             |             |
|----|-------------|-------------|-------------|
| C  | -1.89973600 | -0.71850300 | 1.02426100  |
| C  | -1.88727500 | 0.45461500  | 0.22167700  |
| C  | -3.05656800 | 1.11050700  | -0.11779700 |
| C  | -4.25852000 | 0.61326700  | 0.38111500  |
| C  | -4.30414700 | -0.52922400 | 1.18632300  |
| C  | -3.13418200 | -1.19607600 | 1.50153300  |
| N  | -5.49793400 | 1.29757600  | 0.03148200  |
| O  | -5.42126800 | 2.30107800  | -0.67665900 |
| O  | -6.55180000 | 0.83947000  | 0.46479300  |
| O  | -0.75262100 | -1.28557900 | 1.28632600  |
| N  | -0.58587800 | 0.82060300  | -0.18173900 |
| H  | -3.07478900 | 1.97586800  | -0.76537800 |
| H  | -5.26262700 | -0.87921900 | 1.54311200  |
| H  | -3.14463900 | -2.08610100 | 2.11702200  |
| Ge | 0.75051200  | -0.66106700 | 0.11631900  |
| C  | -0.27983200 | 2.04953400  | -0.51099200 |
| H  | 0.35109000  | 4.57083900  | -0.93209400 |
| C  | 1.16517200  | 3.89676800  | -1.17725600 |

|   |             |             |             |
|---|-------------|-------------|-------------|
| C | 2.35142800  | 4.38822400  | -1.66926900 |
| H | 2.49103000  | 5.45159300  | -1.81358400 |
| C | 3.38365800  | 3.48516300  | -1.99211200 |
| H | 4.31940000  | 3.86646300  | -2.38563200 |
| C | 3.22966500  | 2.12401500  | -1.82024400 |
| H | 4.02037600  | 1.42907400  | -2.07385800 |
| C | 2.02797600  | 1.59550500  | -1.30211400 |
| C | 0.97725900  | 2.50634300  | -0.97888000 |
| O | 1.89069000  | 0.30356500  | -1.16893400 |
| H | -1.06720000 | 2.79581300  | -0.41261900 |
| H | 1.56036600  | -1.28430500 | -2.74431400 |
| C | 1.11333100  | -2.19081300 | -2.36074700 |
| C | 0.63090900  | -2.22141500 | -1.04716700 |
| C | 0.06665100  | -3.40584500 | -0.55544000 |
| H | -0.31902700 | -3.43677900 | 0.45463400  |
| C | -0.01077500 | -4.53767900 | -1.36352400 |
| H | -0.44635900 | -5.44956300 | -0.97119800 |
| C | 0.46420900  | -4.49680200 | -2.67260800 |
| H | 0.39789000  | -5.37644900 | -3.30276200 |
| C | 1.02386000  | -3.32185000 | -3.16955500 |
| H | 1.39398000  | -3.28469600 | -4.18788800 |
| C | 1.96337800  | -0.38017100 | 1.61769700  |
| C | 3.32738300  | -0.16814500 | 1.38044200  |
| H | 3.70095100  | -0.15749000 | 0.36503600  |
| C | 4.20597500  | 0.03137700  | 2.44240400  |
| H | 5.26042700  | 0.18976000  | 2.24676700  |
| C | 3.73038500  | 0.03076100  | 3.75220300  |
| H | 4.41364800  | 0.19123900  | 4.57840700  |
| C | 2.37517800  | -0.17938500 | 3.99717300  |
| H | 2.00140500  | -0.18387700 | 5.01480500  |
| C | 1.49577400  | -0.39031400 | 2.93695800  |
| H | 0.44743700  | -0.57269500 | 3.13045200  |

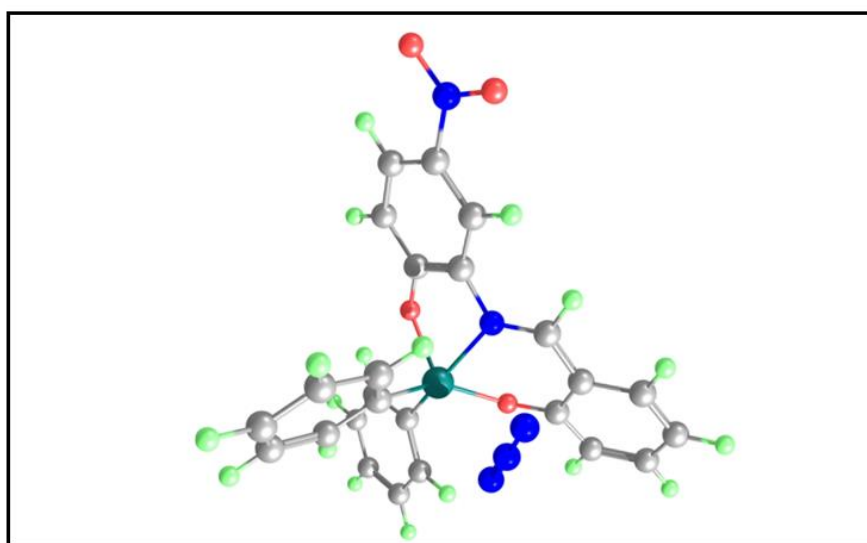

**Figure S48.** DFT-optimized geometry of compound **1** and azide (Transition state 1).

**Table S8.** Cartesian coordinates of DFT-optimized geometry of compound **1** and azide (Transition state 1).

$C_{25}H_{18}N_2O_4Ge + N_3^-$

|    |             |             |             |
|----|-------------|-------------|-------------|
| C  | -1.57405500 | -1.12937800 | -1.30918600 |
| C  | -1.93717000 | 0.10557400  | -0.68966300 |
| C  | -3.26365200 | 0.42797200  | -0.47308400 |
| C  | -4.24826400 | -0.47276400 | -0.89040900 |
| C  | -3.92010400 | -1.68146800 | -1.51258200 |
| C  | -2.59186600 | -2.00625300 | -1.72277000 |
| N  | -5.64374100 | -0.14172900 | -0.67533500 |
| O  | -5.91413900 | 0.93777500  | -0.14418100 |
| O  | -6.50191300 | -0.95240500 | -1.03673500 |
| O  | -0.30151900 | -1.39392800 | -1.47745500 |
| N  | -0.80987300 | 0.88027500  | -0.40806200 |
| H  | -3.55868900 | 1.34653700  | 0.01397100  |
| H  | -4.71542500 | -2.34754900 | -1.81530800 |
| H  | -2.31120600 | -2.93868900 | -2.19544400 |
| Ge | 0.89819400  | -0.38205200 | -0.29770600 |

|   |             |             |             |
|---|-------------|-------------|-------------|
| C | -0.82844500 | 2.16499900  | -0.18609400 |
| H | -0.68582100 | 4.72925400  | 0.41388400  |
| C | 0.25497100  | 4.34776500  | 0.03268300  |
| C | 1.33749100  | 5.18378900  | -0.12931200 |
| H | 1.26218100  | 6.23676100  | 0.11317200  |
| C | 2.54742100  | 4.64766900  | -0.60977200 |
| H | 3.40636700  | 5.29765300  | -0.74159400 |
| C | 2.66482100  | 3.30448800  | -0.90087100 |
| H | 3.59542700  | 2.87699600  | -1.25224600 |
| C | 1.57749600  | 2.42617400  | -0.70819200 |
| C | 0.34272400  | 2.97189400  | -0.26416800 |
| O | 1.74508600  | 1.15668400  | -1.03626000 |
| H | -1.78149600 | 2.67353000  | -0.04817700 |
| H | 3.82077400  | -0.06836900 | 0.21541300  |
| C | 3.75847800  | -0.96852300 | -0.38572600 |
| C | 2.50929400  | -1.39909200 | -0.85029800 |
| C | 2.44453100  | -2.56443300 | -1.61883300 |
| H | 1.48349300  | -2.90997900 | -1.97834800 |
| C | 3.60298100  | -3.28138100 | -1.92493500 |
| H | 3.53743700  | -4.18127100 | -2.52832800 |
| C | 4.83999700  | -2.84678200 | -1.45412600 |
| H | 5.74009500  | -3.40631900 | -1.68696600 |
| C | 4.91460800  | -1.68823000 | -0.68017100 |
| H | 5.87415900  | -1.34558000 | -0.30659800 |
| C | 0.36546800  | -1.21274600 | 1.41726500  |
| C | -0.77055900 | -0.85655400 | 2.15332500  |
| H | -1.37113900 | -0.00849300 | 1.86820000  |
| C | -1.11816600 | -1.55784800 | 3.30659200  |
| H | -1.99246700 | -1.25107300 | 3.87007300  |
| C | -0.34393100 | -2.62985800 | 3.74117700  |

|   |             |             |            |
|---|-------------|-------------|------------|
| H | -0.61727600 | -3.17336900 | 4.63955300 |
| C | 0.79083100  | -2.99297000 | 3.01727800 |
| H | 1.40813500  | -3.82167100 | 3.34881400 |
| C | 1.14010700  | -2.29039700 | 1.86692300 |
| H | 2.02754200  | -2.58306700 | 1.32022400 |
| N | 1.70302100  | 1.40051200  | 1.88378900 |
| N | 0.68107700  | 1.80958900  | 2.31354100 |
| N | -0.36683500 | 2.20927900  | 2.66935900 |

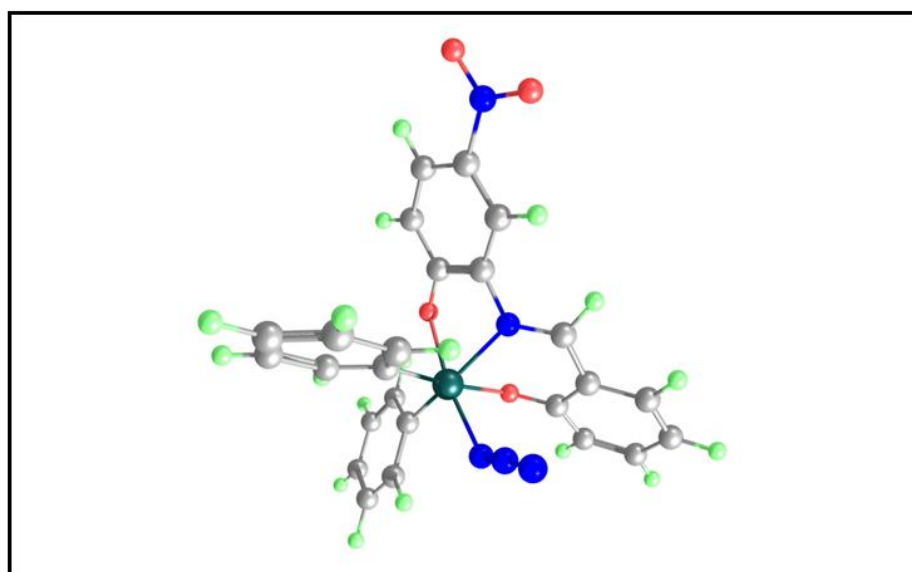

**Figure S49.** DFT-optimized geometry of compound **1** and azide (Intermediate A).

**Table S9.** Cartesian coordinates of DFT-optimized geometry of compound **1** and azide (Intermediate A).

C<sub>25</sub>H<sub>18</sub>N<sub>5</sub>O<sub>4</sub>Ge

|   |             |             |             |
|---|-------------|-------------|-------------|
| C | -1.50726100 | -0.60649100 | -1.44777200 |
| C | -1.80153800 | 0.51201600  | -0.59292300 |
| C | -3.09586100 | 0.90299300  | -0.32939200 |
| C | -4.14579900 | 0.19792500  | -0.92858300 |
| C | -3.89693400 | -0.88794100 | -1.78106200 |
| C | -2.60067300 | -1.28392400 | -2.03803000 |
| N | -5.50536000 | 0.59634100  | -0.66034600 |

|    |             |             |             |
|----|-------------|-------------|-------------|
| O  | -5.70071100 | 1.55689900  | 0.09374400  |
| O  | -6.42369600 | -0.03497000 | -1.19676100 |
| O  | -0.27410900 | -0.94168500 | -1.63644000 |
| N  | -0.62324600 | 1.11941200  | -0.14580600 |
| H  | -3.32072200 | 1.72965900  | 0.33037700  |
| H  | -4.73798100 | -1.40711000 | -2.21890300 |
| H  | -2.39118400 | -2.12832200 | -2.68241500 |
| Ge | 0.93008800  | -0.32926400 | -0.04349400 |
| C  | -0.46647000 | 2.38693900  | 0.07764300  |
| H  | 0.14268200  | 4.80080300  | 1.01899000  |
| C  | 0.97107600  | 4.33738800  | 0.49232000  |
| C  | 2.14204900  | 5.03403800  | 0.28807400  |
| H  | 2.25608200  | 6.04532000  | 0.65898500  |
| C  | 3.18747300  | 4.41164100  | -0.42349400 |
| H  | 4.11111200  | 4.95500400  | -0.59708400 |
| C  | 3.06366900  | 3.12375300  | -0.89920900 |
| H  | 3.86834900  | 2.63760800  | -1.43705500 |
| C  | 1.89204600  | 2.35863900  | -0.66201200 |
| C  | 0.81678800  | 3.01055900  | 0.03772500  |
| O  | 1.81666700  | 1.14551200  | -1.11877700 |
| H  | -1.34567600 | 3.02801700  | 0.18057300  |
| H  | 3.42770600  | -1.35240500 | 1.29312100  |
| C  | 3.44850000  | -1.79826800 | 0.30567200  |
| C  | 2.42256800  | -1.50459500 | -0.59790800 |
| C  | 2.46933200  | -2.07785800 | -1.87269500 |
| H  | 1.67739400  | -1.86349100 | -2.57876700 |
| C  | 3.51650900  | -2.92514700 | -2.23524000 |
| H  | 3.53775400  | -3.36155500 | -3.22904100 |
| C  | 4.53266400  | -3.21444800 | -1.32555600 |
| H  | 5.34637000  | -3.87538500 | -1.60636400 |

|   |             |             |             |
|---|-------------|-------------|-------------|
| C | 4.49545700  | -2.64754100 | -0.05268100 |
| H | 5.28284800  | -2.86493000 | 0.66221100  |
| C | -0.19111800 | -1.51603700 | 1.13402500  |
| C | -1.07432000 | -1.04223200 | 2.11051600  |
| H | -1.19884900 | 0.02201800  | 2.26302500  |
| C | -1.81242500 | -1.92029000 | 2.90381700  |
| H | -2.49237700 | -1.52694000 | 3.65226200  |
| C | -1.68092700 | -3.29657100 | 2.73254900  |
| H | -2.25758500 | -3.98138800 | 3.34551200  |
| C | -0.80458300 | -3.78555200 | 1.76492200  |
| H | -0.69499900 | -4.85603200 | 1.62172300  |
| C | -0.07023900 | -2.90127700 | 0.97586700  |
| H | 0.60484400  | -3.29607100 | 0.22470900  |
| N | 1.84130500  | 0.54074200  | 1.54121600  |
| N | 1.26584600  | 1.08587900  | 2.44509900  |
| N | 0.76664200  | 1.63181200  | 3.32503400  |

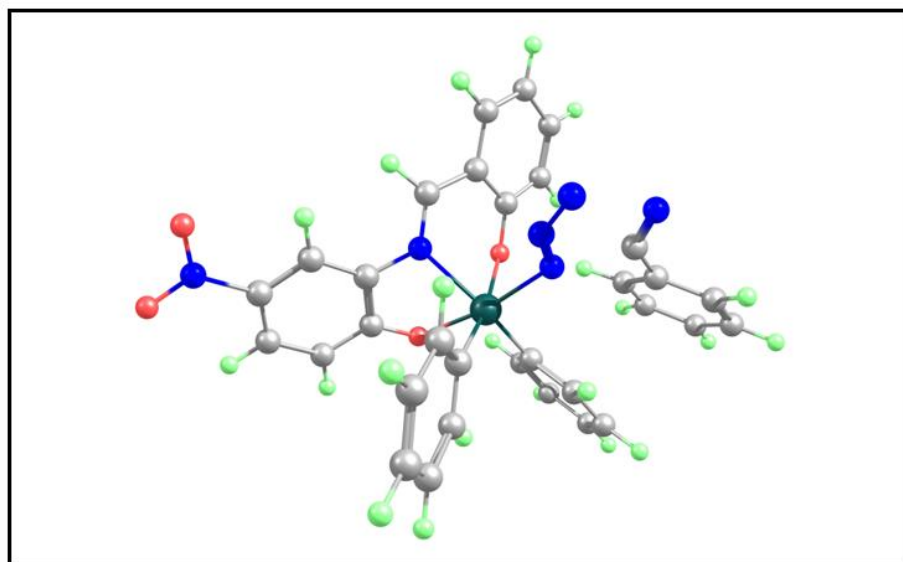

**Figure S50.** DFT-optimized geometry of Str A and benzonitrile (Transition state 2).

**Table S10.** Cartesian coordinates of DFT-optimized geometry of Str A and benzonitrile (Transition state 2).

C<sub>25</sub>H<sub>18</sub>N<sub>5</sub>O<sub>4</sub>Ge + C<sub>7</sub>H<sub>5</sub>N

|    |             |             |             |
|----|-------------|-------------|-------------|
| C  | -2.50148100 | -0.69361700 | -1.39948000 |
| C  | -2.72812600 | 0.45153600  | -0.56092200 |
| C  | -3.99425000 | 0.83300700  | -0.17681800 |
| C  | -5.08663400 | 0.09024800  | -0.63867800 |
| C  | -4.90655800 | -1.02170600 | -1.47458000 |
| C  | -3.63661300 | -1.40801400 | -1.85062600 |
| N  | -6.41858100 | 0.47656200  | -0.24268300 |
| O  | -6.55238300 | 1.46111500  | 0.49336700  |
| O  | -7.37478900 | -0.18902900 | -0.65670500 |
| O  | -1.28620900 | -1.01752900 | -1.69584400 |
| N  | -1.52031300 | 1.09576300  | -0.26463500 |
| H  | -4.16476400 | 1.67955400  | 0.47395700  |
| H  | -5.77855700 | -1.56894100 | -1.80440800 |
| H  | -3.47879300 | -2.27232800 | -2.48314700 |
| Ge | 0.05019200  | -0.34542400 | -0.23625600 |
| C  | -1.36958800 | 2.37544700  | -0.14737900 |
| H  | -0.72610400 | 4.85312300  | 0.57299600  |
| C  | 0.05469600  | 4.37206200  | -0.00761100 |
| C  | 1.17707100  | 5.07818100  | -0.38259600 |
| H  | 1.30512500  | 6.11199800  | -0.08686200 |
| C  | 2.14888500  | 4.43480500  | -1.16990600 |
| H  | 3.03027900  | 4.98332700  | -1.48566100 |
| C  | 2.00774600  | 3.11435300  | -1.54504600 |
| H  | 2.75987700  | 2.62396800  | -2.14979000 |
| C  | 0.90099200  | 2.33910600  | -1.11801600 |
| C  | -0.10934800 | 3.01515600  | -0.35429000 |
| O  | 0.82687700  | 1.08214000  | -1.46489300 |
| H  | -2.24900600 | 3.01032200  | -0.01190900 |



|   |             |             |             |
|---|-------------|-------------|-------------|
| H | 1.98980300  | -2.20446600 | 1.11313200  |
| C | 2.15444500  | -2.35791000 | 0.05241000  |
| C | 1.41329600  | -1.62163900 | -0.87521100 |
| C | 1.64437900  | -1.82835200 | -2.23659700 |
| H | 1.07061100  | -1.26658300 | -2.96330900 |
| C | 2.60620200  | -2.74357300 | -2.66187600 |
| H | 2.77930000  | -2.89267000 | -3.72309100 |
| C | 3.34786300  | -3.46519600 | -1.72701200 |
| H | 4.10393200  | -4.16985400 | -2.05726800 |
| C | 3.11870700  | -3.27184900 | -0.36658200 |
| H | 3.70021100  | -3.81902800 | 0.36735400  |
| C | -0.99358100 | -1.44279200 | 1.09782100  |
| C | -1.65626700 | -0.91365400 | 2.20867100  |
| H | -1.61426400 | 0.14970300  | 2.40776300  |
| C | -2.38354500 | -1.73015700 | 3.07382200  |
| H | -2.89307100 | -1.29304800 | 3.92616800  |
| C | -2.46092000 | -3.10161900 | 2.84090200  |
| H | -3.02801200 | -3.73901700 | 3.51104000  |
| C | -1.81004600 | -3.64548300 | 1.73514800  |
| H | -1.86867900 | -4.71142500 | 1.53917100  |
| C | -1.08944200 | -2.82055600 | 0.87259300  |
| H | -0.60321600 | -3.25523900 | 0.00696500  |
| N | 1.15439400  | 0.60131400  | 1.21464200  |
| N | 0.55573100  | 1.23253700  | 2.11596400  |
| N | 0.84110600  | 1.90053300  | 3.03904000  |
| C | 5.03952300  | -0.18193600 | 1.58817600  |
| C | 6.04345000  | -0.79744500 | 0.84815000  |
| C | 5.95010500  | -0.85952900 | -0.54191700 |
| C | 4.84257400  | -0.31133700 | -1.18304600 |
| C | 3.82750200  | 0.28943000  | -0.44610800 |

|   |            |             |             |
|---|------------|-------------|-------------|
| C | 3.92086300 | 0.36488200  | 0.94448500  |
| H | 5.10420200 | -0.11883200 | 2.66725700  |
| H | 6.89862900 | -1.22884000 | 1.35717800  |
| H | 6.72882600 | -1.34607400 | -1.11902300 |
| H | 4.74465700 | -0.38192800 | -2.25950600 |
| H | 2.94952400 | 0.66727200  | -0.94447900 |
| C | 2.90918000 | 1.02379700  | 1.76890000  |
| N | 2.87893300 | 1.71545200  | 2.75160900  |

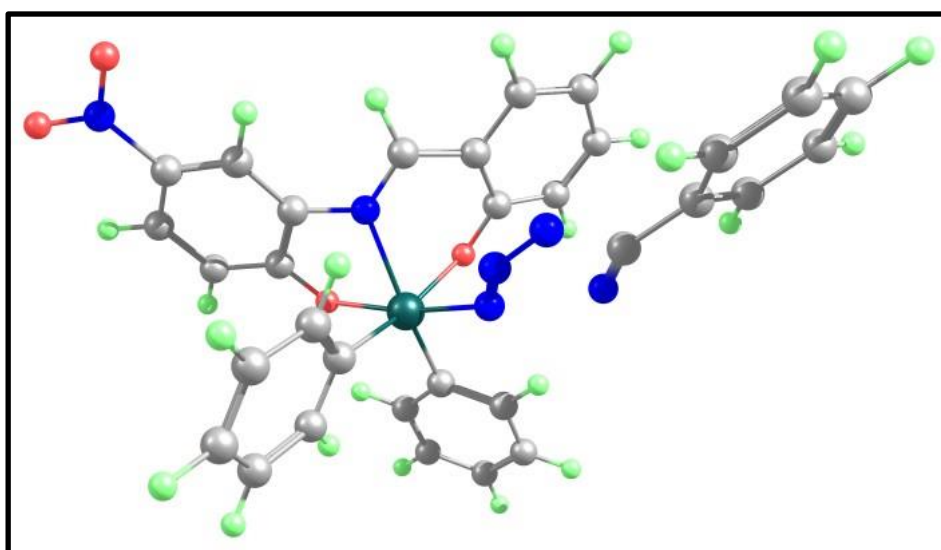

**Figure S51.** DFT-optimized geometry of Intermediate A and benzonitrile (Transition state 2').

**Table S11.** Cartesian coordinates of DFT-optimized geometry of Intermediate A and benzonitrile (Transition state 2').

$C_{25}H_{18}N_5O_4Ge + C_7H_5N$

|   |            |             |             |
|---|------------|-------------|-------------|
| C | 3.12932000 | 0.02583600  | -1.04144200 |
| C | 2.42672800 | -1.17665900 | -0.69291000 |
| C | 3.09387900 | -2.35998800 | -0.45860300 |
| C | 4.48691400 | -2.38160400 | -0.58373000 |
| C | 5.20282500 | -1.23060500 | -0.94038500 |
| C | 4.53453300 | -0.04410300 | -1.16749800 |
| N | 5.19702300 | -3.61459400 | -0.33634200 |

|    |             |             |             |
|----|-------------|-------------|-------------|
| O  | 4.54512000  | -4.61585900 | -0.02009400 |
| O  | 6.42732300  | -3.62097800 | -0.45303100 |
| O  | 2.45132100  | 1.11629100  | -1.22439900 |
| N  | 1.04505200  | -0.96171000 | -0.67687100 |
| H  | 2.57339700  | -3.26419900 | -0.17498300 |
| H  | 6.27887800  | -1.29191000 | -1.02260000 |
| H  | 5.07133800  | 0.85805500  | -1.43191900 |
| Ge | 0.66366300  | 1.08814400  | -0.22674100 |
| C  | 0.14075100  | -1.84165400 | -0.98103400 |
| H  | -2.00656900 | -3.42549900 | -1.10468600 |
| C  | -2.18478400 | -2.44029500 | -1.52349400 |
| C  | -3.38717900 | -2.14791900 | -2.12512400 |
| H  | -4.17765100 | -2.88660200 | -2.16906600 |
| C  | -3.57605200 | -0.86825500 | -2.68480700 |
| H  | -4.51959000 | -0.63301600 | -3.16631800 |
| C  | -2.59967300 | 0.09925200  | -2.60575500 |
| H  | -2.75402000 | 1.09692200  | -2.99595400 |
| C  | -1.37849100 | -0.14641900 | -1.92899200 |
| C  | -1.16372500 | -1.47007300 | -1.41776400 |
| O  | -0.49778200 | 0.80787600  | -1.83509200 |
| H  | 0.41099800  | -2.90020300 | -1.01814100 |
| H  | -1.69416900 | 2.93091200  | 0.23892900  |
| C  | -0.89497300 | 3.57579400  | -0.10496400 |
| C  | 0.34725100  | 3.02638500  | -0.44426600 |
| C  | 1.34951700  | 3.87555100  | -0.92583100 |
| H  | 2.30610600  | 3.45828300  | -1.21392500 |
| C  | 1.12397200  | 5.24740300  | -1.04954900 |
| H  | 1.91271200  | 5.89187000  | -1.42508800 |
| C  | -0.11047800 | 5.78774400  | -0.69600100 |
| H  | -0.28760000 | 6.85432700  | -0.79054900 |

|   |             |             |             |
|---|-------------|-------------|-------------|
| C | -1.11917900 | 4.94650800  | -0.22747100 |
| H | -2.08818100 | 5.35624600  | 0.03913900  |
| C | 1.69543000  | 0.91325500  | 1.49905400  |
| C | 1.71161000  | -0.24332300 | 2.28294700  |
| H | 1.12313500  | -1.10396100 | 1.98810900  |
| C | 2.46614100  | -0.31437600 | 3.45229900  |
| H | 2.46617400  | -1.22678300 | 4.03955900  |
| C | 3.21966000  | 0.78317700  | 3.86514100  |
| H | 3.80891300  | 0.73104200  | 4.77455100  |
| C | 3.20712100  | 1.94741200  | 3.10034900  |
| H | 3.78527400  | 2.81080700  | 3.41411200  |
| C | 2.45335400  | 2.00749300  | 1.92781800  |
| H | 2.45629100  | 2.92161800  | 1.34599600  |
| N | -3.18383300 | 0.92368200  | 0.34208500  |
| N | -1.08502000 | 0.65421500  | 0.85988700  |
| N | -1.34608100 | -0.36532900 | 1.44718300  |
| C | -5.03368600 | -1.89519200 | 1.82116700  |
| C | -6.25366600 | -2.56657400 | 1.85133300  |
| C | -7.29567000 | -2.17614700 | 1.01241900  |
| C | -7.11306000 | -1.10141800 | 0.14100100  |
| C | -5.89953200 | -0.42485200 | 0.11151100  |
| C | -4.84657400 | -0.81661300 | 0.95134800  |
| H | -4.21484300 | -2.20004600 | 2.45698500  |
| H | -6.38851100 | -3.40138600 | 2.53047500  |
| H | -8.24247000 | -2.70466500 | 1.03554200  |
| H | -7.91781500 | -0.79241400 | -0.51729000 |
| H | -5.73947200 | 0.40634500  | -0.56312400 |
| C | -3.58074100 | -0.08670800 | 0.86355400  |
| N | -2.30094800 | -1.03958200 | 1.73048100  |

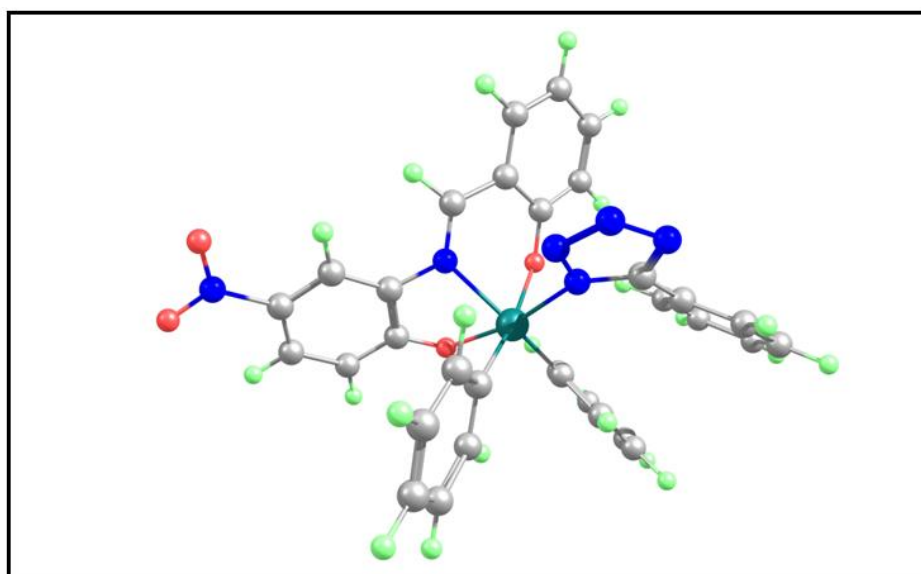

**Figure S52.** DFT-optimized geometry of Str A and benzonitrile (Intermediate B).

**Table S12.** Cartesian coordinates of DFT-optimized geometry of Str A and benzonitrile (Intermediate B).

C<sub>32</sub>H<sub>23</sub>N<sub>6</sub>O<sub>4</sub>Ge

|    |             |             |             |
|----|-------------|-------------|-------------|
| C  | -2.48345900 | -0.63625200 | -1.41922700 |
| C  | -2.69193700 | 0.47727500  | -0.53701200 |
| C  | -3.94795500 | 0.84337500  | -0.10933100 |
| C  | -5.04957800 | 0.11594400  | -0.57482300 |
| C  | -4.88763100 | -0.96408100 | -1.45425500 |
| C  | -3.62564000 | -1.33576400 | -1.87181100 |
| N  | -6.37377300 | 0.48626500  | -0.13724500 |
| O  | -6.49270800 | 1.44588800  | 0.63278200  |
| O  | -7.33752600 | -0.16755000 | -0.55216800 |
| O  | -1.27068400 | -0.94679400 | -1.74842200 |
| N  | -1.47571200 | 1.11439200  | -0.25065000 |
| H  | -4.10251700 | 1.66446500  | 0.57692600  |
| H  | -5.76647600 | -1.49993200 | -1.78452700 |
| H  | -3.48141900 | -2.17665600 | -2.53818900 |
| Ge | 0.06666800  | -0.32599200 | -0.28120000 |

|   |             |             |             |
|---|-------------|-------------|-------------|
| C | -1.32820100 | 2.39296300  | -0.12805200 |
| H | -0.71519000 | 4.87875600  | 0.58102800  |
| C | 0.07395200  | 4.40397300  | 0.00676600  |
| C | 1.19683900  | 5.11744500  | -0.35543500 |
| H | 1.31372500  | 6.15263900  | -0.05970700 |
| C | 2.18415100  | 4.47939400  | -1.12664500 |
| H | 3.06762900  | 5.03219100  | -1.42883100 |
| C | 2.05523300  | 3.15730500  | -1.50318900 |
| H | 2.81884600  | 2.66971300  | -2.09571100 |
| C | 0.94266600  | 2.38079800  | -1.09726200 |
| C | -0.07672700 | 3.04696900  | -0.34143600 |
| O | 0.87422900  | 1.12375800  | -1.45123100 |
| H | -2.21106200 | 3.01875300  | 0.02184900  |
| H | 1.89248700  | -2.38147800 | 0.97587100  |
| C | 2.10936200  | -2.42554300 | -0.08572800 |
| C | 1.42880000  | -1.58423000 | -0.96845600 |
| C | 1.72038200  | -1.66460200 | -2.33200400 |
| H | 1.19508200  | -1.01951400 | -3.02525400 |
| C | 2.68694200  | -2.55267200 | -2.80003500 |
| H | 2.90728500  | -2.60222200 | -3.86174800 |
| C | 3.37575500  | -3.37265000 | -1.90645600 |
| H | 4.13838500  | -4.05422500 | -2.26838100 |
| C | 3.08253800  | -3.30977400 | -0.54631300 |
| H | 3.61918800  | -3.93721600 | 0.15690900  |
| C | -0.94410200 | -1.48381100 | 1.02575800  |
| C | -1.54344900 | -1.03635300 | 2.20730300  |
| H | -1.43607300 | -0.00045000 | 2.49900900  |
| C | -2.26788400 | -1.90833100 | 3.02031100  |
| H | -2.72671200 | -1.53617900 | 3.93053000  |
| C | -2.40700000 | -3.24824900 | 2.66612700  |

|   |             |             |             |
|---|-------------|-------------|-------------|
| H | -2.97273100 | -3.92579800 | 3.29714000  |
| C | -1.81881800 | -3.70890500 | 1.48952500  |
| H | -1.92510300 | -4.74896800 | 1.19792500  |
| C | -1.10075100 | -2.83163700 | 0.67895200  |
| H | -0.66728000 | -3.20001000 | -0.24341400 |
| N | 1.14407100  | 0.64510700  | 1.22908600  |
| N | 0.41679000  | 1.29946000  | 2.16642700  |
| N | 1.22693400  | 1.77367900  | 3.06069200  |
| C | 4.67900800  | -0.25057700 | 1.77275600  |
| C | 5.84350700  | -0.75602300 | 1.20375000  |
| C | 5.99642800  | -0.77098700 | -0.18201900 |
| C | 4.97927000  | -0.27039200 | -0.99136600 |
| C | 3.81419400  | 0.23564000  | -0.42595900 |
| C | 3.64768500  | 0.24094800  | 0.96198300  |
| H | 4.54954900  | -0.23247800 | 2.84743000  |
| H | 6.62935500  | -1.14412700 | 1.84279100  |
| H | 6.89864600  | -1.17653600 | -0.62701000 |
| H | 5.07979400  | -0.29157500 | -2.07013000 |
| H | 3.01933800  | 0.59859800  | -1.05814900 |
| C | 2.43934900  | 0.76620600  | 1.61266900  |
| N | 2.49852000  | 1.45497600  | 2.75309600  |

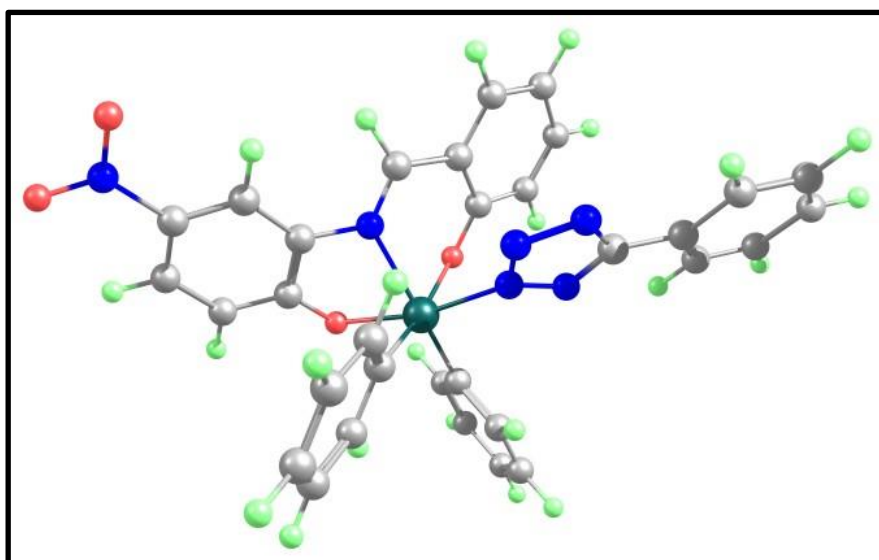

**Figure S53.** DFT-optimized geometry of Intermediate A and benzonitrile (Intermediate B').

**Table S13.** Cartesian coordinates of DFT-optimized geometry of Intermediate A and benzonitrile (Intermediate B').

C<sub>32</sub>H<sub>23</sub>N<sub>6</sub>O<sub>4</sub>Ge

|    |            |             |             |
|----|------------|-------------|-------------|
| C  | 3.04204300 | -0.35103900 | 1.10539000  |
| C  | 2.69301000 | 0.91583400  | 0.52419500  |
| C  | 3.65246000 | 1.81401300  | 0.11265000  |
| C  | 5.00053700 | 1.48198500  | 0.28936200  |
| C  | 5.37824100 | 0.26316700  | 0.87009400  |
| C  | 4.41527000 | -0.64003200 | 1.27308400  |
| N  | 6.01698800 | 2.41312600  | -0.13789500 |
| O  | 5.66038100 | 3.48331600  | -0.64354200 |
| O  | 7.20397200 | 2.10634900  | 0.02125200  |
| O  | 2.09307200 | -1.16655300 | 1.44379500  |
| N  | 1.30282200 | 1.08497200  | 0.49958200  |
| H  | 3.39270400 | 2.75776500  | -0.34650900 |
| H  | 6.43116000 | 0.04629200  | 0.98343400  |
| H  | 4.68863500 | -1.59180400 | 1.71051000  |
| Ge | 0.39271500 | -0.81959600 | 0.33896800  |
| C  | 0.67980700 | 2.20582700  | 0.68362200  |



|   |             |             |             |
|---|-------------|-------------|-------------|
| H | -0.96462200 | 4.30831000  | 0.57149800  |
| C | -1.39679600 | 3.46565300  | 1.10196000  |
| C | -2.63749900 | 3.57630500  | 1.69052500  |
| H | -3.20154400 | 4.49825700  | 1.62113700  |
| C | -3.16393600 | 2.46953800  | 2.38508600  |
| H | -4.14336000 | 2.54606300  | 2.84577500  |
| C | -2.46755800 | 1.28320400  | 2.47314800  |
| H | -2.87740900 | 0.42015400  | 2.98248700  |
| C | -1.21320600 | 1.11921300  | 1.83473000  |
| C | -0.66952100 | 2.25785200  | 1.14880500  |
| O | -0.60080800 | -0.02783800 | 1.90560500  |
| H | 1.22999800  | 3.14611100  | 0.59610500  |
| H | -1.15367600 | -2.91715600 | -1.18845100 |
| C | -1.06678500 | -3.30959800 | -0.18134300 |
| C | -0.40914600 | -2.56378200 | 0.79880300  |
| C | -0.31003200 | -3.08878000 | 2.08949700  |
| H | 0.19676200  | -2.51733200 | 2.85734300  |
| C | -0.85632000 | -4.33474400 | 2.39409600  |
| H | -0.77027700 | -4.73160000 | 3.40074100  |
| C | -1.51446900 | -5.07054200 | 1.40870400  |
| H | -1.94256800 | -6.03925600 | 1.64523700  |
| C | -1.61997000 | -4.55405400 | 0.11846700  |
| H | -2.13317200 | -5.11823100 | -0.65352500 |
| C | 1.45699100  | -1.22818800 | -1.31750200 |
| C | 1.66074600  | -0.33601200 | -2.37460000 |
| H | 1.18528600  | 0.63582900  | -2.35340900 |
| C | 2.45258600  | -0.68763500 | -3.46771300 |
| H | 2.60031500  | 0.02218500  | -4.27520200 |
| C | 3.05484900  | -1.94288200 | -3.52354600 |
| H | 3.67347300  | -2.21557400 | -4.37226300 |

|   |             |             |             |
|---|-------------|-------------|-------------|
| C | 2.85964100  | -2.84377800 | -2.47800600 |
| H | 3.32592400  | -3.82344700 | -2.50905300 |
| C | 2.07114600  | -2.48409700 | -1.38613300 |
| H | 1.93971900  | -3.18805400 | -0.57199000 |
| N | -2.46709000 | -0.26818800 | -0.43260600 |
| N | -1.19988900 | -0.03289200 | -0.76084900 |
| N | -1.10193900 | 0.94807400  | -1.65541800 |
| C | -5.25015200 | 1.67990700  | -1.95615800 |
| C | -6.63112000 | 1.83657300  | -1.88828300 |
| C | -7.38256500 | 1.08151300  | -0.98794500 |
| C | -6.73962900 | 0.16668500  | -0.15334800 |
| C | -5.35947800 | 0.00753300  | -0.21618300 |
| C | -4.60100400 | 0.76256600  | -1.12065600 |
| H | -4.65670300 | 2.26374000  | -2.64844700 |
| H | -7.12306200 | 2.55082500  | -2.53976900 |
| H | -8.45877200 | 1.20521100  | -0.93636100 |
| H | -7.31619700 | -0.42317300 | 0.55101600  |
| H | -4.84905300 | -0.69470000 | 0.43085000  |
| C | -3.14742400 | 0.60922300  | -1.17048200 |
| N | -2.31913500 | 1.36289100  | -1.93380600 |

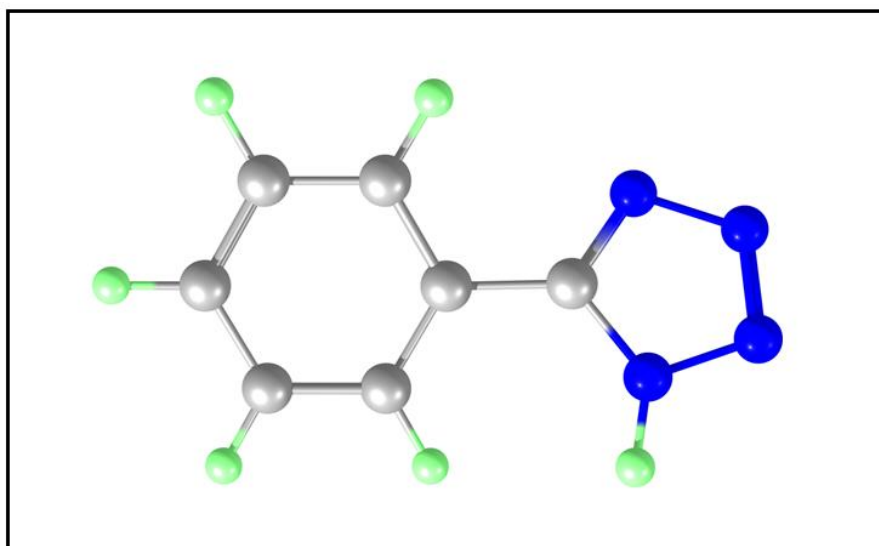

**Figure S54.** DFT-optimized geometry of 5-substituted 1*H*-tetrazole.

**Table S14.** Cartesian coordinates of DFT-optimized geometry of 5-substituted 1*H*-tetrazole.

C<sub>7</sub>H<sub>6</sub>N<sub>4</sub>

|   |             |             |             |
|---|-------------|-------------|-------------|
| C | 0.42266700  | -0.00765200 | -0.00739200 |
| C | 1.13089800  | -1.21344000 | 0.07478400  |
| C | 2.52015100  | -1.20452900 | 0.08299000  |
| C | 3.21680300  | 0.00139400  | 0.00878800  |
| C | 2.51689400  | 1.20309800  | -0.07819900 |
| C | 1.12616100  | 1.20004100  | -0.08900100 |
| H | 0.57787300  | -2.14186100 | 0.13262100  |
| H | 3.06154600  | -2.14064600 | 0.14864600  |
| H | 4.30025600  | 0.00467200  | 0.01609100  |
| H | 3.05301900  | 2.14214800  | -0.14389800 |
| H | 0.59767800  | 2.14283400  | -0.17692800 |
| C | -1.03716100 | -0.04564200 | -0.01063100 |
| N | -1.79644400 | -1.11915300 | -0.15774400 |
| N | -1.86916000 | 1.01032400  | 0.14099100  |
| N | -3.14928400 | 0.57767600  | 0.08601800  |
| N | -3.08432700 | -0.69637700 | -0.09315000 |
| H | -1.67434400 | 1.98594400  | 0.30262200  |

**Table S15.** Different catalysts used for the synthesis of 5-substituted 1*H*-tetrazoles.

| Entry | Catalyst                                                            | Catalyst loading (mol %) | Solvent           | Temp. (°C) | Time (h) | Yields (%) | Ref.             |
|-------|---------------------------------------------------------------------|--------------------------|-------------------|------------|----------|------------|------------------|
| 1     | B(C <sub>6</sub> F <sub>5</sub> ) <sub>3</sub>                      | 5                        | DMF               | 120        | 8        | 94         | 21               |
| 2     | InCl <sub>3</sub>                                                   | 10                       | DMF               | 140        | 24       | 99         | 22               |
| 3     | Mesoporous AlPO <sub>4</sub>                                        | 0.1 g                    | DMF               | 120        | 12       | 92         | 23               |
| 4     | Immobilized AlCl <sub>3</sub> on Al <sub>2</sub> O <sub>3</sub>     | 30 mg                    | DMF               | 50         | 1.5-3    | 83-96      | 24               |
| 5     | Bu <sub>2</sub> Sn(OAc) <sub>2</sub>                                | 1                        | Benzene           | 30         | 60       | 73-99      | 25               |
| 6     | InCl <sub>3</sub>                                                   | 10                       | DMF               | M.W.       | 6-12 min | 95         | 26               |
| 7     | SnCl <sub>2</sub> -nano-SiO <sub>2</sub>                            | 5                        | DMF               | 100        | 4-6      | 92         | 27               |
| 8     | SnCl <sub>2</sub>                                                   | 10                       | DMF               | 120        | 6-8      | 90         | 27               |
| 9     | Al(HSO <sub>4</sub> ) <sub>3</sub>                                  | 10                       | DMF               | 120        | 18       | 91         | 28               |
| 10    | PbCl <sub>2</sub>                                                   | 10                       | DMF               | 120        | 8-10     | 81         | 29               |
| 11    | Triorganotin alkoxide precatalyst                                   | 10                       | DMF               | 150        | 4        | 93         | 30               |
|       |                                                                     |                          | Bu <sub>2</sub> O | 140        |          | 85-99      |                  |
| 12    | Sb <sub>2</sub> O <sub>3</sub>                                      | 0.1                      | DMF               | 120-130    | 8        | 86         | 31               |
| 13    | N,N Dimethylpyridin-4-amine (DMPA) based ionic liquids              | 0.3                      | Solvent-free      | 110-115    | 24       | 89         | 32               |
| 14    | Chitosan supported magnetic ionic liquid nanoparticles (CSMIL)      | 2.5                      | Solvent-free      | 70         | 1-9      | 90         | 33               |
| 15    | 4-(N,N-Dimethylamino)pyridinium acetate                             | 15                       | Solvent-free      | 100        | 2        | 95         | 34               |
| 16    | RuO <sub>2</sub> /MMT                                               | 10                       | Solvent-free      | 120        | 6-8      | 93         | 35               |
| 17    | Tetrabutylammonium fluoride (TBAF)                                  | 0.5                      | Solvent-free      | 50-120     | 1-48     | 97         | 36               |
| 18    | [DBU][OAc]                                                          | 20                       | Solvent-free      | 80         | 1        | 92         | 37               |
| 19    | Expanded perlite                                                    | 0.05                     | Solvent-free      | 110        | 10 min   | 95         | 38               |
| 20    | Fe <sub>3</sub> O <sub>4</sub> @chitin                              | 0.03                     | Solvent-free      | 110        | 20 min   | 95         | 39               |
| 21    | [(C <sub>6</sub> H <sub>5</sub> ) <sub>2</sub> Ge(L <sup>1</sup> )] | 6                        | Solvent-free      | 100        | 8        | 96         | <b>This work</b> |
| 22    | [(C <sub>6</sub> H <sub>5</sub> ) <sub>2</sub> Ge(L <sup>2</sup> )] | 6                        | Solvent-free      | 100        | 8        | 90         |                  |
| 23    | [(C <sub>6</sub> H <sub>5</sub> ) <sub>2</sub> Ge(L <sup>3</sup> )] | 6                        | Solvent-free      | 100        | 8        | 85         |                  |

## References

1. V. Rama, K. Kanagaraj and K. Pitchumani, *J. Org. Chem.*, 2011, **76**, 9090-9095.
2. T. Wang, L. Xu and J. Dong, *Org. Lett.*, 2023, **25**, 6222-6227.
3. B. Agrahari, S. Layek, R. Ganguly and D. D. Pathak, *New J. Chem.*, 2018, **42**, 13754-13762.
4. J.-M. Chrétien, G. Kerric, F. Zammattio, N. Galland, M. Paris, J.-P. Quintard and E. Le Grogneq, *Adv. Synth. Catal.*, 2019, **361**, 747-757.
5. R. A. Saikia, A. Dutta, B. Sarma and A. J. Thakur, *J. Org. Chem.*, 2022, **87**, 9782-9796.
6. M. J. Frisch, G. W. Trucks, H. B. Schlegel, G. E. Scuseria, M. A. Robb, J. R. Cheeseman, G. Scalmani, V. Barone, B. Mennucci and G. A. Petersson, *Gaussian Inc*, 2009.
7. A. D. Becke, *J. Chem. Phys.*, 1993, **98**, 5648-5652.
8. C. Lee, W. Yang and R. G. Parr, *Phys. Rev. B*, 1988, **37**, 785.
9. S. Grimme, J. Antony, S. Ehrlich and H. Krieg, *J. Chem. Phys.*, 2010, **132**.
10. S. Grimme, S. Ehrlich and L. Goerigk, *J. Comput. Chem.*, 2011, **32**, 1456-1465.
11. A. J. H. Wachters, *J. Chem. Phys.*, 1970, **52**, 1033-1036.
12. P. J. Hay, *J. Chem. Phys.*, 1977, **66**, 4377-4384.
13. M. J. Frisch, J. A. Pople and J. S. Binkley, *J. Chem. Phys.*, 1984, **80**, 3265-3269.
14. T. Clark, J. Chandrasekhar, G. W. Spitznagel and P. V. R. Schleyer, *J. Comput. Chem.*, 1983, **4**, 294-301.
15. K. Fukui, *Acc. Chem. Res.*, 1981, **14**, 363-368.
16. R. F. Ribeiro, A. V. Marenich, C. J. Cramer and D. G. Truhlar, *J. Phys. Chem. B*, 2011, **115**, 14556-14562.
17. G. Luchini, J. V. Alegre-Requena, I. Funes-Ardoiz and R. S. Paton, *F1000Research*, 2020, **9**, 291.
18. A. Moser, K. Range and D. M. York, *J. Phys. Chem. B*, 2010, **114**, 13911-13921.
19. D. McQuarrie, Sausalito, CA, 2000, 222-223.
20. R. Dennington, T. Keith, J. Millam and V. GaussView, Shawnee Mission KS, *GaussView*, Version, 2009, **5**.
21. S. K. Prajapati, A. Nagarsenkar and B. N. Babu, *Tetrahedron Lett.*, 2014, **55**, 3507-3510.
22. H. B. Sun, W. L. Chen, Y. H. Sun, P. Qin and X. Qi, *Adv. Mat. Res.*, 2012, **396-398**, 2416-2419.
23. M. Ai, L. Lang, B. Li and Z. Xu, *Chem. Lett.*, 2012, **41**, 814-816.
24. H. M. Nanjundaswamy and H. Abrahamse, *Heterocycles*, 2014, **89(9)**, 2137-2150.
25. H. Yoneyama, N. Oka, Y. Usami and S. Harusawa, *Tetrahedron Lett.*, 2020, **61**, 151517.
26. V. S. Patil, K. P. Nandre, A. U. Borse and S. V. Bhosale, *E-J. Chem.*, 2012, **9**, 1145-1152.
27. A. Kumar, S. Kumar, Y. Khajuria and S. K. Awasthi, *RSC Adv.*, 2016, **6**, 75227-75233.
28. S. M. Sajadi, M. Khalaj, S. M. H. Jamkarani, M. Mahame and M. Kashef, *Synth. Commun.*, 2011, **41**, 3053-3059.
29. R. Kant, V. Singh and A. Agarwal, *C. R. Chim.*, 2016, **19**, 306-313.
30. J. M. Chrétien, G. Kerric, F. Zammattio, N. Galland, M. Paris, J. P. Quintard and E. Le Grogneq, *Adv. Synth. Catal.*, 2019, **361**, 747-757.
31. G. Venkateshwarlu, K. C. Rajanna and P. K. Saiprakash, *Synth. Commun.*, 2009, **39**, 426-432.
32. S. A. Ghumro, S. Saleem, M. Al-Rashida, N. Iqbal, R. D. Alharthy, S. Ahmed, S. T. Moin and A. Hameed, *RSC Adv.*, 2017, **7**, 34197-34207.
33. A. Khalafi-Nezhad and S. Mohammadi, *RSC Adv.*, 2013, **3**, 4362-4371.
34. N. Nowrouzi, S. Farahi and M. Irajzadeh, *Tetrahedron Lett.*, 2015, **56**, 739-742.
35. H. R. Pawar and R. C. Chikate, *J. Mol. Struct.*, 2021, **1225**, 128985.
36. D. Amantini, R. Beleggia, F. Fringuelli, F. Pizzo and L. Vaccaro, *J. Org. Chem.*, 2004, **69**, 2896-2898.
37. M. A. Siddiqui, M. H. Shaikh, A. A. Nagargoje, T. T. Shaikh, V. M. Khedkar, P. P. Deshpande and B. B. Shingate, *Res. Chem. Intermed.*, 2022, **48**, 5187-5208.
38. R. Jahanshahi and B. Akhlaghinia, *RSC Adv.*, 2015, **5**, 104087-104094.
39. M. Zarghani and B. Akhlaghinia, *RSC Adv.*, 2016, **6**, 31850-31860.
